# Supplementary material for: Telomere alterations in neurofibromatosis type 1-associated solid tumors
Source: Springer Nature journal article supplement (doi:10.1186/s40478-019-0792-5), 2019-08-28
Supplement: MOESM1 [file 25666904]

## **Telomere alterations in neurofibromatosis type 1-associated solid tumors**

Fausto J. Rodriguez<sup>1,5\*</sup>, Mindy K. Graham<sup>1</sup>, Jacqueline A. Brosnan-Cashman<sup>1</sup>, John R. Barber<sup>6</sup>, Christine Davis<sup>1</sup>, M. Adelita Vizcaino<sup>1</sup>, Doreen N. Palsgrove<sup>1,5</sup>, Caterina Giannini<sup>7</sup>, Melike Pekmezci<sup>8</sup>, Sonika Dahiya<sup>9</sup>, Murat Gokden<sup>10</sup>, Michael Noë<sup>1</sup>, Laura D. Wood<sup>1,5</sup>, Christine A. Pratilas<sup>5</sup>, Carol Morris<sup>4</sup>, Allan Belzberg<sup>3</sup>, Jaishri Blakeley<sup>2,5</sup>, Christopher M. Heaphy<sup>1,5</sup>

Departments of Pathology<sup>1</sup>, Neurology<sup>2</sup>, Neurosurgery<sup>3</sup>, Orthopedics<sup>4</sup>, and Sidney Kimmel Comprehensive Cancer Center<sup>5</sup>, Johns Hopkins University School of Medicine, Baltimore, MD; Department of Epidemiology, Johns Hopkins Bloomberg School of Public Health<sup>6</sup>, Baltimore, MD; Department of Laboratory Medicine and Pathology, Mayo Clinic<sup>7</sup>, Rochester, MN; Department of Pathology, University of California San Francisco<sup>8</sup>, San Francisco, CA; Department of Pathology, Washington University<sup>10</sup>, St. Louis, MO; University of Arkansas<sup>10</sup>, Little Rock, AR

\*To whom correspondence should be addressed. E-mail: frodrig4@jhmi.edu

### **This PDF includes:**

Figures S1-S2

Tables S1-S6

**Figure S1. MPNST case 78.** Over a number of decades this ALT positive low grade MPNST with ALT but only partial ATRX evolved from a diffuse/cellular neurofibroma lacking ALT (left column) to a neurofibroma with atypia (middle two columns) all the way to ALT positive MPNST (arrows denote large telomeric foci on telomere FISH indicative of ALT).

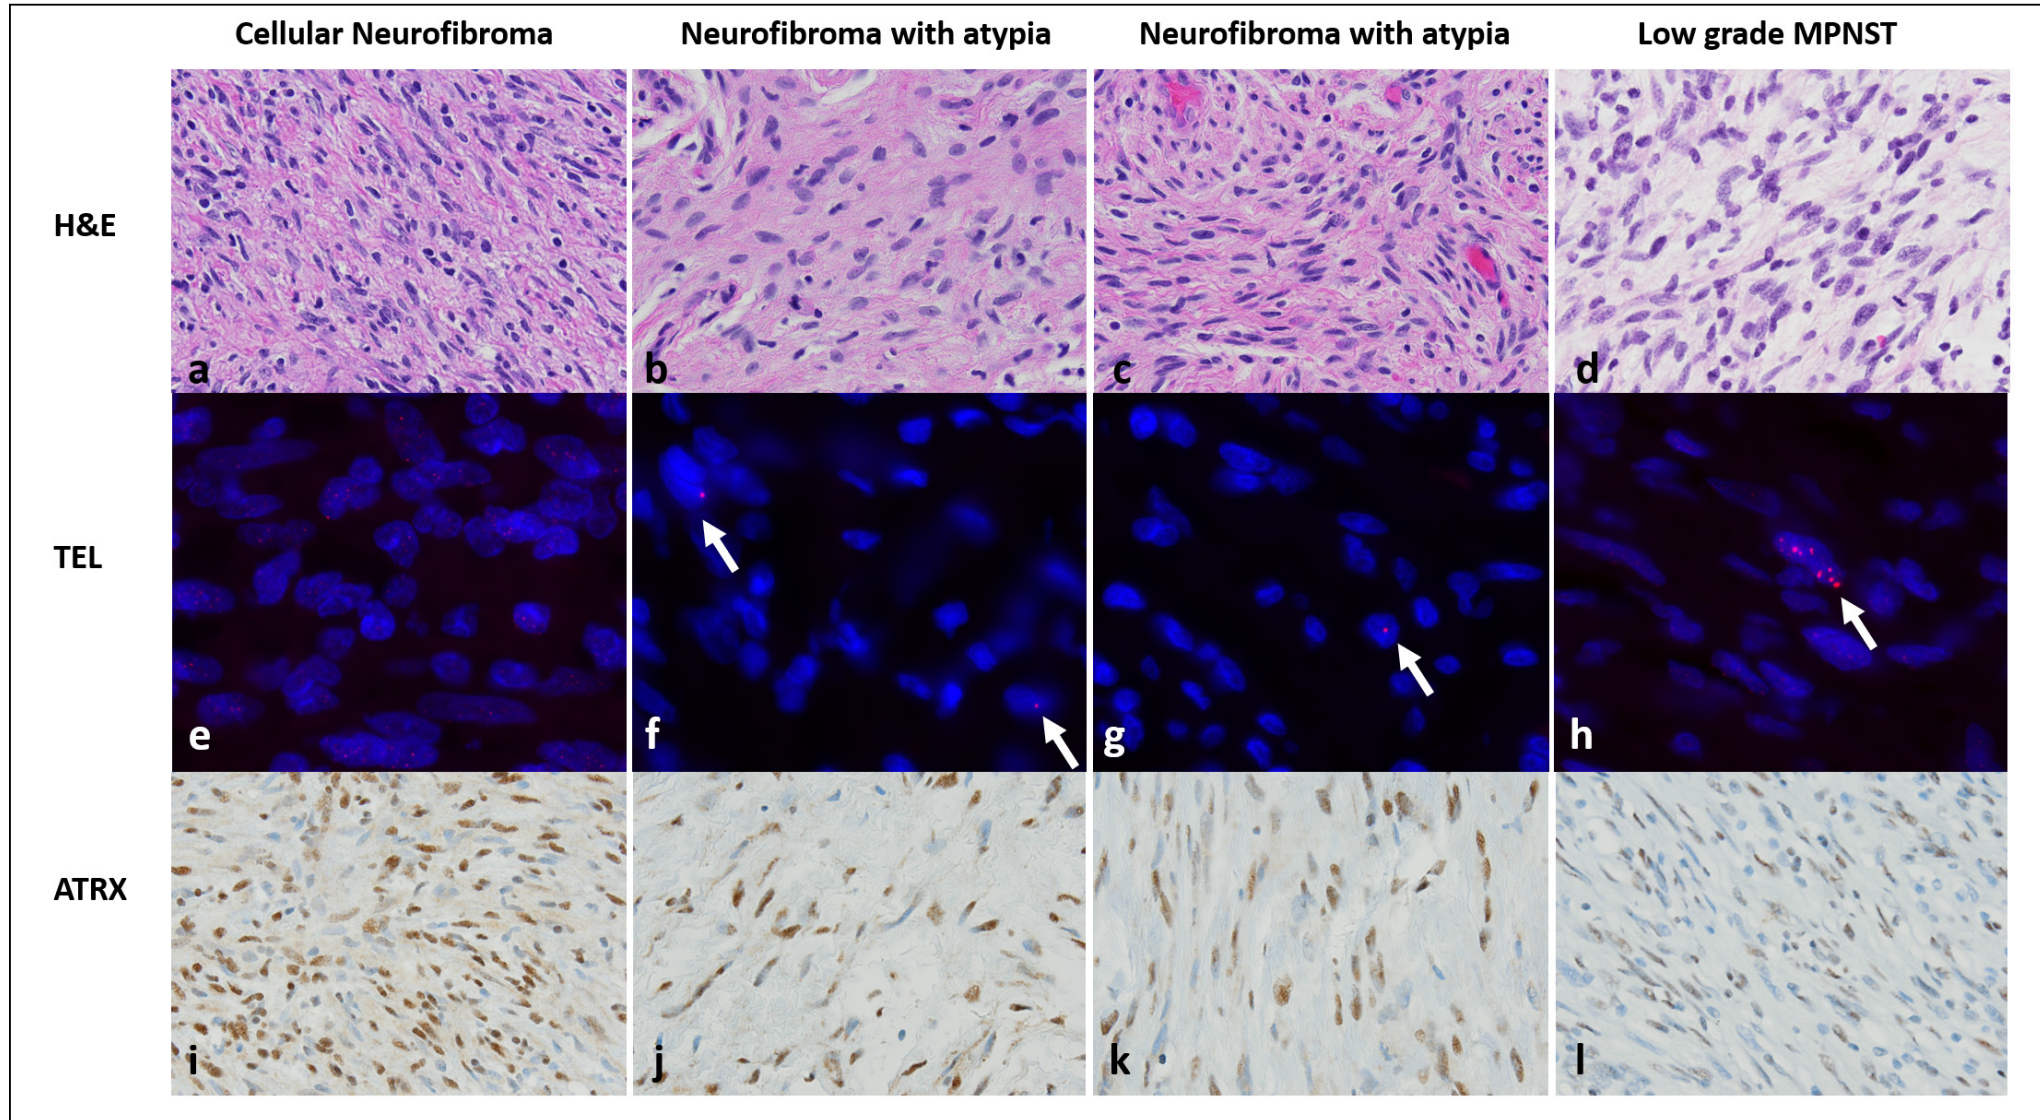

**Figure S2. Telomere alterations are associated with overall survival in combined MPNST group.** In the MPNST cohort, the survival difference between ALT-positive and ALT-negative tumors was not statistically significant ( $p=0.14$ ) (C). However, overall survival was inferior for tumors with ALT, intermediate for tumors with normal telomeres, and superior for tumors with short telomeres ( $p=0.0016$ ), when further subdivided (D).

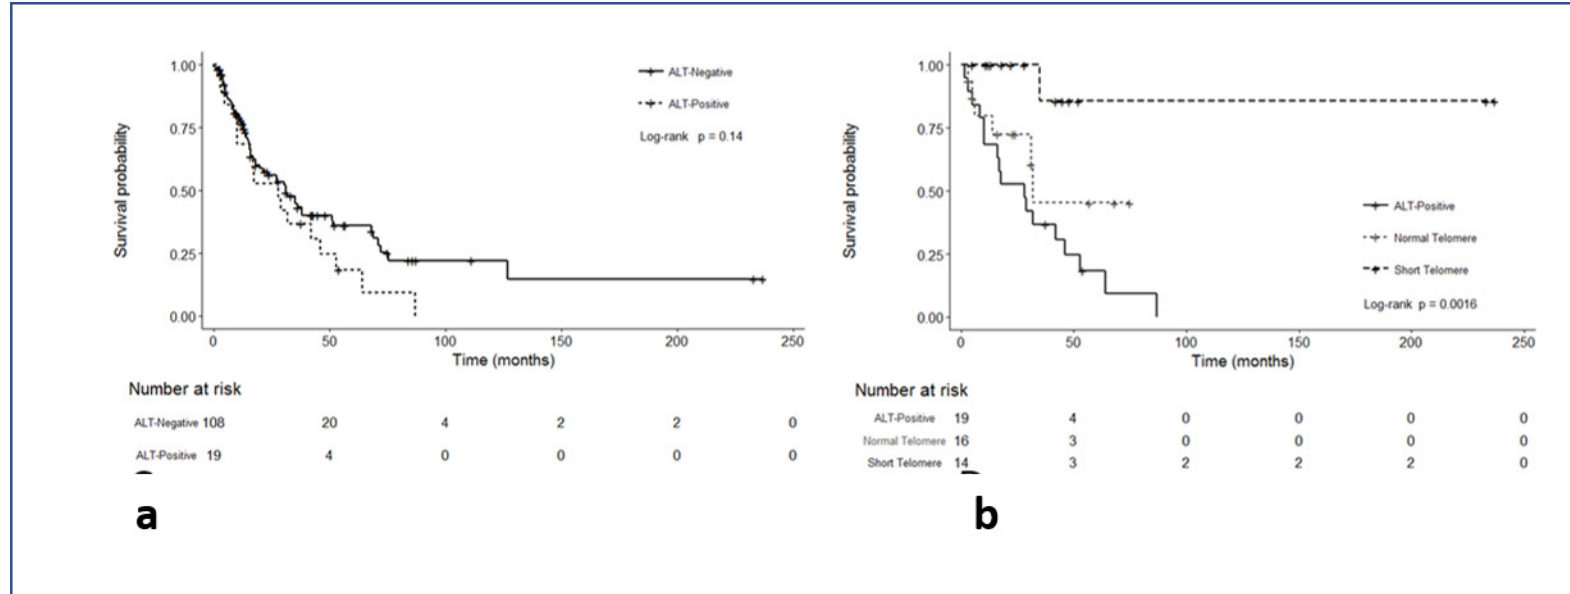

**Table S1. Clinicopathologic Features of NF1-Associated Solid Tumors and MPNST (337 patients)**

| PT # | Age at Dx (years) | Sex | Tumor Location  | Specific Diagnosis     | Grade      | NF1 Status | ALT      | Telomere Lengths | ATRX IHC     | DAXX IHC  | Individual distinct patient =1 | Individual distinct tumor=1 | Primary=1, recurrence=2, metastasis=3 |
|------|-------------------|-----|-----------------|------------------------|------------|------------|----------|------------------|--------------|-----------|--------------------------------|-----------------------------|---------------------------------------|
| 1    | 52                | M   | R periocular    | Neurofibroma           | Benign     | NF1        | NEGATIVE | Normal           |              |           | 1                              | 1                           | 1                                     |
| 2    | 18                | M   | L eye           | Neurofibroma           | Benign     | NF1        | NEGATIVE | Normal           | Preserved    |           | 1                              | 1                           | 1                                     |
| 3    | 41                | M   | Thoracic spine  | MPNST                  | High grade | NF1        | NEGATIVE | Normal           | Partial loss |           | 1                              | 1                           | 1                                     |
| 4    | 38                | M   | L neck          | Cutaneous neurofibroma | Benign     | NF1        | NEGATIVE | Normal           | Preserved    |           | 1                              | 1                           | 1                                     |
| 4    | 38                |     | L nasal         | Cutaneous neurofibroma | Benign     | NF1        | NEGATIVE | Normal           | Preserved    |           |                                | 1                           | 1                                     |
| 4    | 38                |     | Forehead        | Cutaneous neurofibroma | Benign     | NF1        | NEGATIVE | Normal           | Preserved    |           |                                | 1                           | 1                                     |
| 4    | 38                |     | L canthus       | Cutaneous neurofibroma | Benign     | NF1        | NEGATIVE | Normal           | Preserved    |           |                                | 1                           | 1                                     |
| 5    | 7                 | F   | Thalamus        | Pilocytic astrocytoma  | Low grade  | NF1        | NEGATIVE |                  | Preserved    | Preserved | 1                              | 1                           | 2                                     |
| 6    | 38                | M   | R sciatic nerve | MPNST                  | High grade | NF1        | NEGATIVE | Short            | Preserved    |           | 1                              | 1                           | 1                                     |
| 7    | 9                 | M   | Cerebellum      | Pilocytic astrocytoma  | Low grade  | NF1        | NEGATIVE | Normal           |              |           | 1                              | 1                           | 1                                     |
| 8    | 31                | F   | skin            | Neurofibroma           | Benign     | NF1        | NEGATIVE | Normal           | Preserved    |           | 1                              | 1                           | 1                                     |
| 9    | 13                | F   | Pelvis          | MPNST                  | High grade | NF1        | NEGATIVE | Short            | Preserved    |           | 1                              | 1                           | 1                                     |
| 10   | 20                | F   | Temporal lobe   | Gliosarcoma            | High grade | NF1        | NEGATIVE | Normal           | Preserved    | Preserved | 1                              | 1                           | 1                                     |
| 10   | 18                | F   | Mediastinum     | MPNST                  | High grade | NF1        | NEGATIVE |                  | Preserved    |           |                                | 1                           | 1                                     |
| 10   | 18                | F   | Mediastinum     | Neurofibroma           | Benign     | NF1        | NEGATIVE |                  |              |           |                                | 1                           | 1                                     |
| 11   | 37                | F   | Frontal lobe    | Anaplastic astrocytoma | High grade | NF1        | POSITIVE | ALT              | Loss         | Preserved | 1                              | 1                           | 1                                     |
| 11   | 42                | F   | Frontal lobe    | Anaplastic astrocytoma | High grade | NF1        | POSITIVE | ALT              | Loss         | Preserved |                                |                             | 2                                     |
| 12   |                   |     |                 | Angiolipoma            | Benign     | NF1        | NEGATIVE | Normal           |              |           |                                | 1                           | 1                                     |
| 12   |                   |     |                 | Angiolipoma            | Benign     | NF1        | NEGATIVE | Normal           |              |           |                                | 1                           | 1                                     |
| 12   |                   |     |                 | Lipoma                 | Benign     | NF1        | NEGATIVE | Normal           |              |           |                                | 1                           | 1                                     |
| 12   |                   |     |                 | Lipoma                 | Benign     | NF1        | NEGATIVE | Normal           |              |           |                                | 1                           | 1                                     |
| 12   |                   |     |                 | Lipoma                 | Benign     | NF1        | NEGATIVE |                  |              |           | 1                              | 1                           | 1                                     |
| 12   |                   |     |                 | Lipoma                 | Benign     | NF1        | NEGATIVE |                  |              |           |                                | 1                           | 1                                     |
| 12   |                   |     |                 | Plexiform neurofibroma | Benign     | NF1        | NEGATIVE | Normal           |              |           |                                | 1                           | 1                                     |
| 13   | 27                | M   | Brainstem       | Anaplastic astrocytoma | High grade | NF1        | POSITIVE | ALT              | Loss         |           | 1                              | 1                           | 1                                     |
| 14   | 33                | M   | Pleura          | MPNST                  | High grade | NF1        | NEGATIVE | Normal           | Preserved    |           | 1                              | 1                           | 2                                     |
| 15   | 5                 | M   | R orbit         | Plexiform neurofibroma | Benign     | NF1        | NEGATIVE | Normal           | Preserved    |           | 1                              | 1                           | 1                                     |
| 16   | 76                | F   | Sciatic nerve   | MPNST                  | High grade | sporadic   | NEGATIVE | Short            |              |           | 1                              | 1                           | 1                                     |
| 17   | 19                | M   | skin            | Plexiform neurofibroma | Benign     | NF1        | NEGATIVE | Normal           | Partial loss |           | 1                              | 1                           | 1                                     |
| 18   | 31                | M   | L orbit         | Plexiform neurofibroma | Benign     | NF1        | NEGATIVE | Normal           | Preserved    |           | 1                              | 1                           | 2                                     |
| 19   | 27                | M   | L axilla        | Neurofibroma           | Benign     | NF1        | NEGATIVE | Normal           | Preserved    |           | 1                              |                             | 2                                     |

|    |    |   |                         |                        |            |          |          |        |              |           |   |   |   |
|----|----|---|-------------------------|------------------------|------------|----------|----------|--------|--------------|-----------|---|---|---|
| 19 | 19 | M | Brachial plexus         | Neurofibroma           | Benign     | NF1      | NEGATIVE | Normal | Preserved    |           | 1 | 1 |   |
| 20 | 33 | M | L sciatic/femoral nerve | Plexiform neurofibroma | Benign     | NF1      | NEGATIVE | Normal | Preserved    | 1         | 1 | 1 |   |
| 21 | 17 | F | Spine                   | Atypical neurofibroma  | Benign     | NF1      | NEGATIVE |        | Preserved    | 1         | 1 | 1 |   |
| 21 | 17 | F | L leg                   | MPNST                  | High grade | NF1      | NEGATIVE | Short  | Preserved    |           | 1 | 1 |   |
| 22 | 37 | F | R adrenal gland         | Pheochromocytoma       | Benign     | NF1      | NEGATIVE | Short  | Preserved    | 1         | 1 | 1 |   |
| 22 | 37 | F | Pericaval               | Plexiform neurofibroma | Benign     | NF1      | NEGATIVE | Normal | Preserved    |           | 1 | 1 |   |
| 22 | 37 | F | Duodenum-medial         | GIST                   | Low grade  | NF1      | NEGATIVE | Normal | Preserved    |           | 1 | 1 |   |
| 22 | 37 | F | Duodenum-lateral        | GIST                   | Low grade  | NF1      | NEGATIVE | Normal | Preserved    |           | 1 | 1 |   |
| 23 | 20 | M | L thigh                 | Glomangioma            | Benign     | sporadic | NEGATIVE | Normal | Preserved    | 1         | 1 | 1 |   |
| 24 | 13 | F | Brainstem               | Pilocytic astrocytoma  | Low grade  | NF1      |          |        | Preserved    | 1         | 1 | 1 |   |
| 25 | 32 | F | Cerebellum              | Pilocytic astrocytoma  | Low grade  | NF1      | POSITIVE | ALT    | Loss         | 1         | 1 | 1 |   |
| 26 | 14 | F | Thalamus                | Pilocytic astrocytoma  | Low grade  | NF1      | NEGATIVE |        | Partial loss | Preserved | 1 | 1 | 1 |
| 27 | 9  | M | Spinal cord             | Glioblastoma           | High grade | NF1      | NEGATIVE |        | Preserved    | Preserved | 1 | 1 | 1 |
| 28 | 34 | M | Femur                   | MPNST                  | High grade | sporadic | NEGATIVE | Short  | Preserved    | 1         | 1 | 1 |   |
| 29 | 52 | M | L scalp                 | Diffuse neurofibroma   | Benign     | NF1      | NEGATIVE | Normal | Preserved    |           | 1 | 1 |   |
| 29 | 52 | M | L adrenal gland         | Pheochromocytoma       | Benign     | NF1      | NEGATIVE |        |              | 1         | 1 | 1 |   |
| 30 | 12 | M | retroperitoneum         | MPNST                  | High grade | NF1      | NEGATIVE | Normal | Preserved    | 1         | 1 | 1 |   |
| 30 | 12 | M |                         | Plexiform neurofibroma | Benign     | NF1      | NEGATIVE | Normal | Preserved    |           | 1 | 1 |   |
| 31 | 34 | M | cerebellum              | Diffuse Astrocytoma    | Low grade  | NF1      | NEGATIVE | Long   | Preserved    | 1         | 1 | 1 |   |
| 32 | 38 | F | skin                    | Neurofibroma           | Benign     | NF1      | NEGATIVE | Normal | Preserved    | 1         | 1 | 1 |   |
| 33 | 46 | M | skin                    | Neurofibroma           | Benign     | NF1      | NEGATIVE | Normal | Partial loss | 1         | 1 | 1 |   |
| 33 | 55 | M | skin                    | Neurofibroma           | Benign     | NF1      | NEGATIVE | Normal | Preserved    |           | 1 | 1 |   |
| 33 | 46 | M |                         | Plexiform neurofibroma | Benign     | NF1      | NEGATIVE |        |              |           | 1 | 1 |   |
| 34 | 52 | M | L brow                  | Neurofibroma           | Benign     | NF1      | NEGATIVE | Normal | Preserved    | 1         | 1 | 1 |   |
| 35 | 8  | M | Spine                   | Atypical neurofibroma  | Benign     | NF1      | NEGATIVE | Normal | Preserved    | 1         | 1 | 1 |   |
| 36 | 59 | F | R thumb                 | Glomus tumor           | Benign     | NF1      | NEGATIVE | Normal |              | 1         | 1 | 1 |   |
| 36 | 59 | F | skin                    | Neurofibroma           | Benign     | NF1      | NEGATIVE | Normal |              |           | 1 | 1 |   |
| 36 | 59 | F | skin                    | Neurofibroma           | Benign     | NF1      | NEGATIVE | Normal |              |           | 1 | 1 |   |
| 36 | 59 | F | R small finger          | Plexiform neurofibroma | Benign     | NF1      | NEGATIVE | Normal |              |           | 1 | 1 |   |
| 37 | 25 | M | radial nerve            | MPNST                  | High grade | NF1      | NEGATIVE | Short  | Preserved    | 1         | 1 | 1 |   |
| 38 | 11 | M | Occipital lobe          | Low grade astrocytoma  | Low grade  | NF1      | NEGATIVE |        | Preserved    | Preserved | 1 | 1 | 1 |
| 39 | 13 | M | 4th ventricle           | Pilocytic astrocytoma  | Low grade  | NF1      | NEGATIVE |        | Preserved    | Preserved | 1 | 1 | 1 |
| 40 | 18 | M | R orbit                 | Neurofibroma           | Benign     | NF1      | NEGATIVE | Normal |              |           | 1 | 1 | 1 |
| 41 | 7  | M | Forehead                | Plexiform neurofibroma | Benign     | NF1      | NEGATIVE | Normal | Preserved    | 1         | 1 | 1 |   |
| 42 | 45 | M | L calf                  | Dermatofibroma         | Benign     | NF1      | NEGATIVE | Normal |              |           | 1 | 1 | 1 |
| 43 | 60 | F | L small finger          | Glomus tumor           | Benign     | NF1      | NEGATIVE | Normal | Preserved    |           | 1 | 1 |   |

|    |    |   |                    |                                  |            |                 |          |        |              |              |   |   |   |
|----|----|---|--------------------|----------------------------------|------------|-----------------|----------|--------|--------------|--------------|---|---|---|
| 43 | 60 | F | L index finger     | Neurofibroma                     | Benign     | NF1             | NEGATIVE | Normal | Preserved    |              | 1 | 1 | 1 |
| 43 | 60 | F | L small finger     | Neurofibroma                     | Benign     | NF1             | NEGATIVE | Normal | Preserved    |              |   | 1 | 1 |
| 44 | 44 | F | Calf               | Massive soft tissue neurofibroma | Benign     | NF1             | NEGATIVE | Normal | Preserved    |              |   | 1 | 1 |
| 44 | 44 | F | scalp              | Neurofibroma                     | Benign     | NF1             | NEGATIVE | Normal | Preserved    |              | 1 | 1 | 1 |
| 45 | 20 | M | R paraspinal       | Neurofibroma                     | Benign     | NF1             | NEGATIVE | Normal | Preserved    |              | 1 | 1 | 1 |
| 45 | 21 | M | L Paraspinal       | Neurofibroma                     | Benign     | NF1             |          |        | Preserved    |              |   | 1 | 1 |
| 45 | 21 | M | R thigh            | Neurofibroma                     | Benign     | NF1             |          |        | Preserved    |              |   | 1 | 1 |
| 45 | 18 | M | L neck             | Syringocystadenoma papilliferum  | Benign     | NF1             | NEGATIVE | Normal | Preserved    |              |   | 1 | 1 |
| 46 | 50 | F | ampulla            | Gangliocytic paraganglioma       | Benign     | NF1             | NEGATIVE | Normal |              |              |   |   | 1 |
| 46 | 50 | F | Ampulla            | Gangliocytic paraganglioma       | Benign     | NF1             | NEGATIVE |        |              |              | 1 | 1 | 1 |
| 47 | 37 | F | soft tissue        | Plexiform neurofibroma           | Benign     | NF1             | NEGATIVE |        | Partial loss |              |   | 1 | 1 |
| 47 | 37 | F | skin               | Neurofibroma                     | Benign     | NF1             | NEGATIVE | Normal | Preserved    |              | 1 | 1 | 1 |
| 47 | 37 | F | soft tissue        | Plexiform neurofibroma           | Benign     | NF1             |          |        | Preserved    |              |   | 1 | 1 |
| 48 | 34 | F | L orbit            | Neurofibroma                     | Benign     | NF1             | NEGATIVE | Normal | Preserved    |              |   | 1 | 1 |
| 48 | 23 | F | R shoulder         | Plexiform neurofibroma           | Benign     | NF1             | NEGATIVE | Normal | Preserved    |              | 1 | 1 | 1 |
| 48 | 23 | F | back               | Plexiform neurofibroma           | Benign     | NF1             | NEGATIVE | Normal | Preserved    |              |   | 1 | 1 |
| 48 | 23 | F | L neck             | Plexiform neurofibroma           | Benign     | NF1             | NEGATIVE | Normal |              |              |   | 1 | 1 |
| 49 | 31 | F | R foot             | Atypical neurofibroma            | Benign     | Schwannomatosis | NEGATIVE | Normal | Preserved    |              | 1 | 1 | 1 |
| 50 | 25 | F | Groin              | Diffuse neurofibroma             | Benign     | NF1             | NEGATIVE | Normal | Preserved    |              | 1 | 1 | 1 |
| 50 | 25 | F | L breast           | Neurofibroma                     | Benign     | NF1             | NEGATIVE | Normal | Preserved    |              |   | 1 | 1 |
| 50 | 25 | F | L neck             | Neurofibroma                     | Benign     | NF1             | NEGATIVE | Normal | Preserved    |              |   | 1 | 1 |
| 51 | 4  | M | Suprasellar region | Pilocytic astrocytoma            | Low grade  | NF1             | NEGATIVE |        | Preserved    |              | 1 | 1 | 2 |
| 51 | 17 | M | Parietal lobe      | Pilocytic astrocytoma            | Low grade  | NF1             | NEGATIVE |        | Preserved    | Preserved    |   | 1 | 1 |
| 52 | 41 | M | R neck             | MPNST                            | High grade | NF1             | NEGATIVE | Short  | Preserved    | Partial loss | 1 | 1 | 2 |
| 53 | 60 | F | L knee             | MPNST                            | High grade | NF1             | POSITIVE | ALT    | Partial loss | Preserved    | 1 | 1 | 1 |
| 53 | 49 | F | L upper lid        | Diffuse neurofibroma             | Benign     | NF1             | NEGATIVE | Normal | Preserved    |              |   | 1 | 1 |
| 54 | 42 | F | L buttock          | Massive soft tissue neurofibroma | Benign     | NF1             | NEGATIVE | Normal | Preserved    |              | 1 | 1 | 1 |
| 55 | 11 | M | Spinal cord        | Diffuse Astrocytoma              | Low grade  | NF1             | NEGATIVE |        | Preserved    | Preserved    | 1 | 1 | 1 |
| 56 | 20 | M | Jejunum            | GIST                             | Low grade  | NF1             | NEGATIVE | Short  |              |              | 1 | 1 | 1 |
| 57 | 15 | F | scalp              | Plexiform neurofibroma           | Benign     | NF1             | NEGATIVE | Normal | Preserved    |              | 1 | 1 | 1 |
| 58 | 26 | F | Proximal femur     | MPNST                            | High grade | NF1             | NEGATIVE | Normal | Preserved    |              | 1 | 1 | 3 |
| 59 | 15 | M | R frontal lobe     | Low grade astrocytoma            | Low grade  | NF1             | POSITIVE | ALT    | Preserved    | Preserved    | 1 | 1 | 1 |
| 60 | 20 | F | L frontal lobe     | SEGA-like astrocytoma            | Low grade  | NF1             | POSITIVE | ALT    | Preserved    | Preserved    | 1 | 1 | 1 |
| 60 | 21 | F | chest wall         | Cutaneous neurofibroma           | Benign     | NF1             | NEGATIVE | Normal | Preserved    |              |   | 1 | 1 |
| 60 | 21 | F | Left arm           | Cutaneous neurofibroma           | Benign     | NF1             | NEGATIVE | Normal | Preserved    |              |   | 1 | 1 |
| 60 | 21 | F | Left hip           | Diffuse neurofibroma             | Benign     | NF1             | NEGATIVE | Normal | Preserved    |              |   | 1 | 1 |

|    |    |   |                   |                                                    |            |          |          |        |              |              |   |   |   |
|----|----|---|-------------------|----------------------------------------------------|------------|----------|----------|--------|--------------|--------------|---|---|---|
| 61 | 28 | M | Mediastinum       | MPNST                                              | High grade | NF1      | NEGATIVE | Normal | Partial loss | Preserved    | 1 | 1 | 1 |
| 61 | 28 | M | Mediastinum       | MPNST                                              | High grade | NF1      | NEGATIVE | Short  | Preserved    | Preserved    |   | 0 | 1 |
| 61 | 28 | M | R neck            | ANNUBP                                             | Benign     | NF1      | NEGATIVE | Normal | Preserved    |              |   | 1 | 1 |
| 61 | 28 | M | L thigh           | Neurofibroma                                       | Benign     | NF1      | NEGATIVE | Normal | Preserved    |              |   | 1 | 1 |
| 62 | 61 | M | R lower lid       | Neurofibroma                                       | Benign     | NF1      | NEGATIVE | Normal | Preserved    |              | 1 | 1 | 1 |
| 63 | 37 | M | Axilla            | Atypical neurofibroma                              | Benign     | NF1      | NEGATIVE |        | Partial loss |              |   | 1 | 1 |
| 63 | 37 | M | Lumbar-paraspinal | MPNST                                              | Low grade  | NF1      | NEGATIVE | Normal | Preserved    |              | 1 | 1 | 2 |
| 64 | 64 | F | gluteus           | Atypical neurofibroma                              | Benign     | NF1      |          |        | Partial loss |              |   | 1 | 1 |
| 64 | 64 | F | R sciatic nerve   | Atypical neurofibroma                              | Benign     | NF1      | NEGATIVE | Normal | Preserved    |              | 1 | 1 | 2 |
| 65 | 33 | F | R paraspinal      | MPNST                                              | High grade | NF1      | POSITIVE | ALT    | Partial loss | Preserved    | 1 | 1 | 1 |
| 65 | 33 | F | Lung              | MPNST                                              | High grade | NF1      | POSITIVE | ALT    | Partial loss | Preserved    |   | 1 | 3 |
| 65 | 33 | F | lung              | MPNST                                              | High grade | NF1      | POSITIVE | ALT    | Partial loss | Preserved    |   | 1 | 3 |
| 65 | 34 | F | lung              | MPNST                                              | High grade | NF1      | POSITIVE | ALT    | Preserved    | Preserved    |   | 1 | 3 |
| 66 | 64 | M | L brachial plexus | MPNST                                              |            | sporadic | NEGATIVE | Short  | Preserved    |              | 1 | 1 | 1 |
| 67 | 52 | M | Femoral nerve     | MPNST                                              | High grade | NF1      | NEGATIVE | Normal | Preserved    |              | 1 | 1 | 1 |
| 67 | 52 | M | Femoral nerve     | MPNST                                              | High grade | NF1      | NEGATIVE | Short  |              |              |   | 1 | 1 |
| 68 | 16 | F | Frontal lobe      | Oligodendroglioma, IDH mutant and 1p/19q codeleted | Low grade  | NF1      | NEGATIVE | Long   | Preserved    |              | 1 | 1 | 1 |
| 69 | 36 | F | R adrenal gland   | Pheochromocytoma                                   |            | NF1      | NEGATIVE |        | Preserved    |              | 1 | 1 | 1 |
| 69 | 36 | F | L adrenal gland   | Pheochromocytoma                                   |            | NF1      | NEGATIVE |        | Preserved    |              |   | 1 | 1 |
| 70 | 25 | M | R thalamus        | Diffuse Astrocytoma                                | Low grade  | NF1      | POSITIVE | ALT    | Loss         | Preserved    | 1 | 1 | 1 |
| 70 | 26 | M | R thalamus        | Diffuse Astrocytoma                                | Low grade  | NF1      | POSITIVE | ALT    |              |              |   |   | 2 |
| 71 | 2  | M | periorbital       | Plexiform neurofibroma                             | Benign     | NF1      | NEGATIVE | Normal | Partial loss |              | 1 | 1 | 2 |
| 72 | 50 | M | L face            | Spindle cell tumor                                 | Low grade  | NF1      | NEGATIVE | Normal | Preserved    |              | 1 | 1 | 1 |
| 73 | 9  | M | R orbit           | Plexiform neurofibroma                             | Benign     | NF1      | NEGATIVE | Normal | Preserved    |              | 1 | 1 | 1 |
| 74 | 19 | F | L orbit           | Plexiform neurofibroma                             | Benign     | NF1      | NEGATIVE | Normal | Preserved    |              | 1 | 1 | 1 |
| 74 | 22 | F | L orbit           | Plexiform neurofibroma                             | Benign     | NF1      |          |        | Preserved    |              |   |   | 2 |
| 74 | 21 | F | L eyelid          | Diffuse neurofibroma                               | Benign     | NF1      | NEGATIVE | Normal |              |              |   |   | 2 |
| 74 | 20 | F | L orbit           | Diffuse neurofibroma                               | Benign     | NF1      | NEGATIVE | Normal |              |              |   |   | 2 |
| 75 | 9  | F | Tectum            | Low grade astrocytoma                              | Low grade  | NF1      | NEGATIVE |        | Preserved    | Preserved    | 1 | 1 | 1 |
| 76 | 40 | F | R orbit           | Diffuse neurofibroma                               | Benign     | NF1      | NEGATIVE | Normal |              |              | 1 | 1 | 1 |
| 77 | 35 | F | R thigh           | Localized intraneural neurofibroma                 | Benign     | NF1      | NEGATIVE | Normal | Preserved    |              |   | 1 | 1 |
| 77 | 35 | F | R waist           | Localized intraneural neurofibroma                 | Benign     | NF1      | NEGATIVE | Normal | Preserved    |              |   | 1 | 1 |
| 77 | 26 | F | Sacrum            | Neurofibroma                                       | Benign     | NF1      | NEGATIVE | Normal | Preserved    |              | 1 | 1 | 1 |
| 77 | 35 | F | L thigh           | Plexiform neurofibroma                             | Benign     | NF1      | NEGATIVE | Normal | Preserved    |              |   | 1 | 1 |
| 78 | 62 | F | Intracranial      | MPNST                                              | Low grade  | NF1      | POSITIVE | ALT    | Partial loss | Partial loss | 1 | 1 | 1 |
| 78 | 60 | F | scalp             | Atypical neurofibroma                              | Benign     | NF1      | POSITIVE | ALT    | Partial loss | Preserved    |   | 1 | 2 |

|    |    |   |                        |                                 |            |          |          |        |              |           |   |   |   |
|----|----|---|------------------------|---------------------------------|------------|----------|----------|--------|--------------|-----------|---|---|---|
| 78 | 60 | F | R temporal             | Diffuse neurofibroma            | Benign     | NF1      | POSITIVE | ALT    | Partial loss | Preserved |   |   | 2 |
| 78 | 58 | F | Back-skin              | Cutaneous neurofibroma          | Benign     | NF1      | NEGATIVE | Normal | Partial loss |           | 1 |   | 1 |
| 78 | 58 | F | Back-skin              | Cutaneous neurofibroma          | Benign     | NF1      | NEGATIVE | Normal | Partial loss |           | 1 |   | 1 |
| 78 | 58 | F | R buttock              | Malignant spindle cell neoplasm | High grade | NF1      | POSITIVE | ALT    | Partial loss |           |   |   | 3 |
| 78 | 58 | F | F forehead             | Diffuse neurofibroma            | Benign     | NF1      | NEGATIVE | Normal | Partial loss |           |   |   | 2 |
| 78 | 57 | F | R orbit                | Diffuse neurofibroma            | Benign     | NF1      | NEGATIVE | Normal | Preserved    |           |   |   | 2 |
| 78 | 56 | F | L small finger         | Glomus tumor                    | Benign     | NF1      | NEGATIVE |        | Preserved    |           | 1 |   | 1 |
| 78 | 56 | F | R eyelid               | Neurofibroma                    | Benign     | NF1      | NEGATIVE | Normal | Preserved    |           |   |   | 2 |
| 78 | 56 | F | L small finger         | Traumatic neuroma               | Benign     | NF1      | NEGATIVE | Normal | Preserved    |           | 1 |   | 1 |
| 78 | 58 | F | Back-skin              | Cutaneous neurofibroma          | Benign     | NF1      | NEGATIVE | Normal |              |           | 1 |   | 1 |
| 78 | 58 | F | Back-skin              | Cutaneous neurofibroma          | Benign     | NF1      | NEGATIVE | Normal |              |           | 1 |   | 1 |
| 78 | 58 | F | Back-skin              | Cutaneous neurofibroma          | Benign     | NF1      | NEGATIVE | Normal |              |           | 1 |   | 1 |
| 78 | 58 | F | Back-skin              | Cutaneous neurofibroma          | Benign     | NF1      | NEGATIVE | Normal |              |           | 1 |   | 1 |
| 78 | 55 | F | R orbit                | Diffuse neurofibroma            | Benign     | NF1      | NEGATIVE | Normal |              |           |   |   | 2 |
| 79 | 9  | M | L eyelid               | Plexiform neurofibroma          | Benign     | NF1      | NEGATIVE | Normal | Preserved    |           | 1 | 1 | 1 |
| 80 | 30 | M | R buttock              | Diffuse neurofibroma            | Benign     | NF1      | NEGATIVE | Normal | Preserved    |           | 1 |   | 1 |
| 80 | 30 | M | R shoulder             | Neurofibroma                    | Benign     | NF1      | NEGATIVE | Normal | Preserved    |           | 1 | 1 | 1 |
| 80 | 30 | M | R elbow                | Neurofibroma                    | Benign     | NF1      | NEGATIVE | Normal | Preserved    |           | 1 |   | 1 |
| 81 | 1  | F | Eyelid                 | Plexiform neurofibroma          | Benign     | NF1      | NEGATIVE | Normal | Preserved    |           | 1 | 1 | 1 |
| 82 | 16 | m | L orbit                | Plexiform neurofibroma          | Benign     | NF1      | NEGATIVE | Normal | Preserved    |           | 1 | 1 | 1 |
| 83 | 39 | M | R adrenal gland        | Pheochromocytoma                | Benign     | NF1      | NEGATIVE |        | Preserved    |           | 1 | 1 | 1 |
| 84 | 15 | M | Spinal cord            | Ganglioglioma                   | Low grade  | NF1      | NEGATIVE |        |              |           | 1 | 1 | 1 |
| 85 | 54 | M | brain                  | Anaplastic astrocytoma          | High grade | NF1      | NEGATIVE |        | Preserved    |           | 1 |   | 1 |
| 85 | 54 | M | pelvis                 | GIST                            | High grade | NF1      | NEGATIVE | Normal | Preserved    |           | 1 | 1 | 1 |
| 86 | 26 | M | R conjunctiva          | Plexiform neurofibroma          | Benign     | NF1      | NEGATIVE | Normal |              |           | 1 | 1 | 2 |
| 86 | 25 | M | Orbit                  | Plexiform neurofibroma          | Benign     | NF1      | NEGATIVE | Normal |              |           |   |   | 1 |
| 87 | 64 | M | Lumber nerve root      | MPNST                           | High grade | sporadic | NEGATIVE | Short  |              |           | 1 | 1 | 1 |
| 88 | 57 | F | L adrenal gland        | Pheochromocytoma                | Benign     | NF1      | NEGATIVE |        | Loss         |           | 1 | 1 | 1 |
| 89 | 38 | M | L femoral nerve        | Atypical neurofibroma           | Benign     | NF1      | NEGATIVE | Normal | Preserved    |           | 1 | 1 | 1 |
| 90 | 64 | F | L upper lid            | Neurofibroma                    | Benign     | NF1      | NEGATIVE | Normal | Preserved    |           | 1 | 1 | 1 |
| 91 | 49 | M | L peroneal nerve       | Atypical neurofibroma           | Benign     | NF1      | NEGATIVE | Normal | Preserved    |           | 1 | 1 | 1 |
| 92 | 59 | F | Eyelid                 | Neurofibroma                    | Benign     | NF1      | NEGATIVE |        | Preserved    |           | 1 | 1 | 1 |
| 93 | 54 | F | small bowel            | GIST                            | High grade | NF1      | NEGATIVE | Normal | Preserved    |           | 1 | 1 | 1 |
| 93 | 54 | F | Ovaries (disseminated) | Ovarian serous carcinoma        | High grade | NF1      | NEGATIVE |        | Preserved    |           | 1 |   | 1 |
| 94 | 44 | F | Pelvis                 | Atypical neurofibroma           | Benign     | NF1      | NEGATIVE | Normal | Preserved    |           | 1 |   | 1 |
| 94 | 44 | F | Sciatic nerve          | MPNST                           | High grade | NF1      | NEGATIVE | Normal | Preserved    |           | 1 | 1 | 1 |



|     |    |   |                                 |                                      |            |                 |          |        |              |           |   |   |   |
|-----|----|---|---------------------------------|--------------------------------------|------------|-----------------|----------|--------|--------------|-----------|---|---|---|
| 95  | 15 | F | Lumbar region                   | MPNST                                | High grade | NF1             | NEGATIVE | Short  | Preserved    |           | 1 | 1 | 1 |
| 96  | 18 | F | supraclavicular                 | MPNST                                | High grade | NF1             | NEGATIVE | Normal | Preserved    |           | 1 | 1 | 1 |
| 97  | 25 | M | buttock                         | Plexiform neurofibroma               | Benign     | NF1             | NEGATIVE | Normal | Preserved    |           | 1 | 1 | 1 |
| 98  | 39 | F | Retroperitoneum                 | MPNST                                | High grade | NF1             | NEGATIVE | Short  |              | Preserved |   | 1 | 1 |
| 98  | 37 | F | retroperitoneum                 | Atypical neurofibroma                | Benign     | NF1             | NEGATIVE | Normal | Preserved    |           | 1 | 1 | 1 |
| 98  | 40 | F | brain                           | MPNST                                | High grade | NF1             | NEGATIVE | Short  | Preserved    |           |   | 1 | 3 |
| 98  | 39 | F | retroperitoneum                 | MPNST                                | High grade | NF1             | NEGATIVE | Short  |              |           |   |   | 1 |
| 99  | 60 | M | Lung                            | MPNST                                | High grade | sporadic        | NEGATIVE | Short  | Preserved    |           | 1 | 1 | 3 |
| 99  | 58 | M | inguinal region                 | MPNST                                | High grade | sporadic        | NEGATIVE | Short  |              |           |   | 1 | 3 |
| 100 | 79 | F | L eyelid                        | Neurofibroma                         | Benign     | NF1             | NEGATIVE | Normal | Preserved    |           | 1 | 1 | 1 |
| 101 | 42 | F | R plexus                        | Plexiform neurofibroma               | Benign     | NF1             | NEGATIVE | Normal | Preserved    |           | 1 | 1 | 1 |
| 102 | 50 | F | skin                            | Neurofibroma                         | Benign     | NF1             | NEGATIVE | Normal | Preserved    |           | 1 | 1 | 1 |
| 102 | 62 | F | L orbit                         | Neurofibroma                         | Benign     | NF1             | NEGATIVE | Normal | Preserved    |           |   | 1 | 1 |
| 103 | 10 | M | Femoral nerve                   | MPNST                                | High grade | NF1             | NEGATIVE | Long   | Preserved    |           | 1 | 1 | 1 |
| 103 | 9  | M | L thigh                         | Neurofibroma                         | Benign     | NF1             | Negative | Normal | Preserved    |           |   | 1 | 1 |
| 103 | 10 | M | Femoral nerve                   | Plexiform neurofibroma               | Benign     | NF1             |          |        | Preserved    |           |   | 1 | 1 |
| 104 | 27 | M | L spinal                        | MPNST                                | High grade | Schwannomatosis | NEGATIVE | Normal | Preserved    | Preserved | 1 | 1 | 1 |
| 105 | 9  | F | R lower lid                     | Plexiform neurofibroma               | Benign     | NF1             | NEGATIVE | Normal | Preserved    |           | 1 | 1 | 1 |
| 106 | 17 | F | L upper lid                     | Diffuse neurofibroma                 | Benign     | NF1             | NEGATIVE | Normal | Preserved    |           | 1 | 1 | 1 |
| 107 | 62 | M | R brachial plexus               | Atypical neurofibroma                | Benign     | NF1             | NEGATIVE |        | Preserved    |           |   | 1 | 1 |
| 107 | 62 | M | R brachial plexus               | Neurofibroma                         | Benign     | NF1             | NEGATIVE |        | Preserved    |           | 1 | 1 | 1 |
| 108 | 32 | M | skin                            | Neurofibroma                         | Benign     | NF1             | NEGATIVE | Normal |              |           | 1 | 1 | 1 |
| 109 | 62 | F | R index finger                  | Glomus tumor                         | Benign     | NF1             | NEGATIVE | Normal | Preserved    |           | 1 | 1 | 1 |
| 110 | 33 | F | L posterior thigh/sciatic nerve | MPNST                                | High grade | NF1             | POSITIVE | ALT    | Loss         | Equivocal | 1 | 1 | 1 |
| 110 | 33 | F | L posterior thigh/sciatic nerve | MPNST                                | High grade | NF1             | POSITIVE | ALT    | Loss         | Preserved |   |   | 1 |
| 110 | 33 | F | L posterior thigh/sciatic nerve | Neurofibroma                         | Benign     | NF1             | NEGATIVE | Normal | Partial loss |           |   | 1 | 1 |
| 111 | 2  | F | L upper lid                     | Diffuse neurofibroma                 | Benign     | NF1             | NEGATIVE | Normal | Preserved    |           | 1 |   | 2 |
| 111 | 1  | F | L orbit                         | Plexiform neurofibroma               | Benign     | NF1             | NEGATIVE | Normal | Preserved    |           |   | 1 | 1 |
| 112 | 43 | F | R orbit                         | Diffuse neurofibroma                 | Benign     | NF1             | NEGATIVE | Normal | Preserved    |           | 1 | 1 | 2 |
| 113 | 22 | M | Pineal region                   | Pilocytic astrocytoma with anaplasia | High grade | NF1             | POSITIVE | ALT    | Loss         |           | 1 | 1 | 1 |
| 114 | 15 | M | abdomen                         | Plexiform neurofibroma               | Benign     | NF1             | NEGATIVE | Normal | Preserved    |           | 1 | 1 | 1 |
| 115 | 42 | M | R chest wall                    | Neurofibroma                         | Benign     | NF1             | NEGATIVE | Normal | Preserved    |           |   | 1 | 1 |
| 115 | 42 | M | L upper chest                   | Neurofibroma                         | Benign     | NF1             | NEGATIVE | Normal | Preserved    |           |   | 1 | 1 |
| 115 | 42 | M | L center chest                  | Neurofibroma                         | Benign     | NF1             | NEGATIVE | Normal | Preserved    |           |   | 1 | 1 |
| 115 | 42 | M | sternum                         | Neurofibroma                         | Benign     | NF1             | NEGATIVE | Normal | Preserved    |           |   | 1 | 1 |
| 115 | 42 | M | L neck                          | Neurofibroma                         | Benign     | NF1             | NEGATIVE | Normal | Preserved    |           |   | 1 | 1 |

|     |    |   |                          |                        |            |     |          |        |           |           |   |   |   |
|-----|----|---|--------------------------|------------------------|------------|-----|----------|--------|-----------|-----------|---|---|---|
| 115 | 42 | M | L lower abdomen          | Neurofibroma           | Benign     | NF1 | NEGATIVE | Normal | Preserved |           | 1 | 1 |   |
| 115 | 42 | M | L upper thigh            | Neurofibroma           | Benign     | NF1 | NEGATIVE | Normal | Preserved |           | 1 | 1 |   |
| 115 | 42 | M | buttocks                 | Neurofibroma           | Benign     | NF1 | NEGATIVE | Normal | Preserved |           | 1 | 1 |   |
| 115 | 42 | M | L flank                  | Neurofibroma           | Benign     | NF1 | NEGATIVE | Normal | Preserved |           | 1 | 1 |   |
| 115 | 42 | M | L flank                  | Neurofibroma           | Benign     | NF1 | NEGATIVE | Normal | Preserved |           | 1 | 1 |   |
| 115 | 42 | M | Upper center back        | Neurofibroma           | Benign     | NF1 | NEGATIVE | Normal | Preserved |           | 1 | 1 |   |
| 115 | 42 | M | R upper back             | Neurofibroma           | Benign     | NF1 | NEGATIVE | Normal | Preserved |           | 1 | 1 |   |
| 115 | 42 | M | L posterior auricular    | Neurofibroma+nevus     | Benign     | NF1 | NEGATIVE | Normal | Preserved |           | 1 | 1 |   |
| 115 | 42 | M | L shoulder               | Neurofibroma+nevus     | Benign     | NF1 | NEGATIVE | Normal | Preserved |           | 1 | 1 |   |
| 115 | 42 | M | center upper chest       | Neurofibroma+nevus     | Benign     | NF1 | NEGATIVE | Normal | Preserved |           | 1 | 1 |   |
| 115 | 42 | M | center abdomen           | Neurofibroma+nevus     | Benign     | NF1 | NEGATIVE | Normal | Preserved |           | 1 | 1 |   |
| 115 | 41 | M | L adrenal                | Pheochromocytoma       | Benign     | NF1 | NEGATIVE |        |           |           | 1 | 1 | 1 |
| 116 | 18 | F | L thigh                  | Plexiform neurofibroma | Benign     | NF1 | NEGATIVE | Normal | Preserved |           | 1 | 1 | 2 |
| 117 | 24 | M | L paraspinal             | MPNST                  | High grade | NF1 | NEGATIVE | Normal | Preserved |           | 1 | 1 | 1 |
| 117 | 22 | M | R foot                   | Neurofibroma           | Benign     | NF1 | NEGATIVE | Normal | Preserved |           | 1 | 1 | 1 |
| 117 | 24 | M | L paraspinal             | Plexiform neurofibroma | Benign     | NF1 | NEGATIVE | Normal | Preserved |           |   |   | 2 |
| 117 | 25 | M | L paraspinal             | Plexiform neurofibroma | Benign     | NF1 | NEGATIVE | Normal | Preserved |           |   |   | 2 |
| 118 | 15 | M | skin                     | Neurofibroma           | Benign     | NF1 | NEGATIVE | Normal | Preserved |           | 1 | 1 | 1 |
| 118 | 14 | M | skin                     | Neurofibroma           | Benign     | NF1 | NEGATIVE | Normal |           |           | 1 | 1 | 1 |
| 119 | 39 | M | small bowel              | GIST                   | Low grade  | NF1 | NEGATIVE | Short  |           |           | 1 | 1 | 1 |
| 119 | 39 | M | small bowel              | GIST                   | Low grade  | NF1 | NEGATIVE | Short  |           |           | 1 | 1 | 1 |
| 119 | 39 | M | small bowel              | GIST                   | Low grade  | NF1 | NEGATIVE | Short  |           |           | 1 | 1 | 1 |
| 120 | 35 | M | small bowel              | GIST                   | Low grade  | NF1 | NEGATIVE | Normal | Preserved |           | 1 | 1 | 1 |
| 121 | 46 | F | skin                     | Neurofibroma           | Benign     | NF1 | NEGATIVE | Normal | Preserved |           | 1 | 1 | 1 |
| 122 | 44 | M | Sciatic nerve            | MPNST                  | High grade | NF1 | NEGATIVE | Short  | Preserved |           | 1 | 1 | 2 |
| 122 | 41 | M | Chest wall               | Neurofibroma           | Benign     | NF1 | NEGATIVE | Normal | Preserved |           | 1 | 1 | 1 |
| 123 | 75 | F | abdomen                  | GIST                   | High grade | NF1 | NEGATIVE | Normal |           |           | 1 | 1 | 1 |
| 124 | 35 | F | L parieto-occipital lobe | Ganglioglioma          | Low grade  | NF1 |          |        |           |           | 1 | 1 | 1 |
| 125 | 8  | F | R upper eyelid           | Diffuse neurofibroma   | Benign     | NF1 | NEGATIVE | Normal | Preserved |           | 1 | 1 | 2 |
| 125 | 9  | F | R upper eyelid           | Diffuse neurofibroma   | Benign     | NF1 | NEGATIVE | Normal |           |           |   |   | 2 |
| 126 | 14 | M | Brainstem                | Diffuse Astrocytoma    | Low grade  | NF1 | NEGATIVE | Normal | Preserved | Preserved | 1 | 1 | 1 |
| 127 | 23 | M | Sciatic nerve            | MPNST                  | High grade | NF1 | NEGATIVE | Normal |           |           | 1 | 1 | 1 |
| 128 | 39 | M | cerebellum               | Diffuse Astrocytoma    | Low grade  | NF1 | POSITIVE | ALT    | Loss      |           | 1 | 1 | 1 |
| 129 | 20 | F | Frontal lobe             | SEGA-like astrocytoma  | Low grade  | NF1 | NEGATIVE | Long   | Preserved | Preserved | 1 | 1 | 1 |
| 130 | 15 | M | R frontal lobe           | SEGA-like astrocytoma  | Low grade  | NF1 | POSITIVE | ALT    | Preserved | Preserved | 1 | 1 | 1 |
| 131 | 17 | M | L frontal lobe           | SEGA-like astrocytoma  | Low grade  | NF1 | NEGATIVE | Normal | Preserved | Preserved | 1 | 1 | 1 |

|     |    |   |                     |                                              |            |     |          |        |              |           |   |   |   |
|-----|----|---|---------------------|----------------------------------------------|------------|-----|----------|--------|--------------|-----------|---|---|---|
| 132 | 24 | F | brain               | SEGA-like astrocytoma                        | Low grade  | NF1 | POSITIVE | ALT    | Preserved    | Preserved | 1 | 1 | 1 |
| 133 | 53 | F | Lateral ventricle   | SEGA-like astrocytoma                        | Low grade  | NF1 | NEGATIVE | Long   | Preserved    |           | 1 | 1 | 1 |
| 134 | 25 | M | L frontal lobe      | SEGA-like astrocytoma                        | High grade | NF1 | POSITIVE | ALT    | Aberrent     | Preserved | 1 | 1 | 1 |
| 135 | 9  | M | Suprasellar         | SEGA-like astrocytoma                        | Low grade  | NF1 | NEGATIVE |        | Preserved    |           | 1 | 1 | 1 |
| 136 | 12 | F | cerebellum          | Pilocytic astrocytoma with anaplasia         | High grade | NF1 | NEGATIVE | Long   | Preserved    |           | 1 | 1 | 1 |
| 137 | 46 | F | R temporal lobe     | Pilocytic astrocytoma with anaplasia         | High grade | NF1 | NEGATIVE |        | Partial loss |           | 1 | 1 | 1 |
| 138 | 29 | M | cerebellum          | Pilocytic astrocytoma with anaplasia         | High grade | NF1 | POSITIVE | ALT    | Loss         |           | 1 | 1 | 1 |
| 139 | 46 | M | L parietal lobe     | Pilocytic astrocytoma with anaplasia         | High grade | NF1 | POSITIVE | ALT    | Loss         |           | 1 | 1 | 1 |
| 140 | 4  | F | Cerebellum          | Glioblastoma with giant cell features        | High grade | NF1 | POSITIVE | ALT    | Loss         | Preserved | 1 | 1 | 1 |
| 141 | 14 | M | 4th ventricle       | Pilocytic astrocytoma                        | Low grade  | NF1 | NEGATIVE | Normal | Preserved    | Preserved | 1 | 1 | 1 |
| 142 | 48 | F | Brain               | Diffuse Astrocytoma                          | Low grade  | NF1 | POSITIVE | ALT    | Partial loss | Preserved | 1 | 1 | 1 |
| 143 | 34 | M | Parietal lobe       | Anaplastic pleomorphic xanthoastrocytoma     | High grade | NF1 | POSITIVE | ALT    | Preserved    | Preserved | 1 | 1 | 1 |
| 144 | 19 | F | Temporal lobe       | Low grade astrocytoma                        | Low grade  | NF1 | NEGATIVE | Normal | Preserved    | Preserved | 1 | 1 | 1 |
| 145 | 5  | M | Optic Nerve         | Pilocytic astrocytoma                        | Low grade  | NF1 | NEGATIVE | Long   | Preserved    |           | 1 | 1 | 1 |
| 146 | 20 | F | L frontal lobe      | Anaplastic pleomorphic xanthoastrocytoma     | High grade | NF1 | POSITIVE | ALT    | Partial loss |           | 1 | 1 | 1 |
| 147 | 4  | F | Lateral ventricle   | Pilocytic astrocytoma                        | High grade | NF1 | NEGATIVE | Long   | Preserved    |           | 1 | 1 | 1 |
| 147 | 2  | F | Optic Nerve         | Pilocytic astrocytoma                        | Low grade  | NF1 | NEGATIVE | Long   | Preserved    |           |   | 1 | 1 |
| 147 | 4  | F | Lateral ventricle   | SEGA-like astrocytoma                        | Low grade  | NF1 | NEGATIVE |        |              |           |   |   | 2 |
| 148 | 37 | M | Brainstem           | Pilocytic astrocytoma with atypical features | Low grade  | NF1 | POSITIVE | ALT    | Loss         |           | 1 | 1 | 1 |
| 148 | 38 | M | Brainstem           | Pilocytic astrocytoma with atypical features | Low grade  | NF1 | POSITIVE | ALT    | Loss         |           |   |   | 2 |
| 149 | 49 | F | Frontal lobe        | SEGA-like astrocytoma                        | High grade | NF1 | NEGATIVE |        |              |           | 1 | 1 | 1 |
| 150 | 25 | F | Lateral ventricle   | SEGA-like astrocytoma                        | Low grade  | NF1 | NEGATIVE | Normal | Preserved    |           | 1 | 1 | 1 |
| 151 | 46 | F | Temporal lobe       | SEGA-like astrocytoma                        | Low grade  | NF1 | NEGATIVE | Normal |              |           | 1 | 1 | 1 |
| 152 | 17 | M | L frontal lobe      | Pilocytic astrocytoma                        | Low grade  | NF1 | NEGATIVE | Normal | Preserved    |           | 1 | 1 | 1 |
| 153 | 13 | M | R frontal lobe      | Pilocytic astrocytoma                        | Low grade  | NF1 | NEGATIVE | Long   | Preserved    |           | 1 | 1 | 1 |
| 154 | 10 | F | cerebellum          | Pilocytic astrocytoma                        | Low grade  | NF1 | NEGATIVE | Normal | Preserved    |           | 1 | 1 | 1 |
| 155 | 2  | M | L optic nerve       | Pilocytic astrocytoma                        | Low grade  | NF1 | NEGATIVE | Normal | Partial loss |           | 1 | 1 | 1 |
| 156 | 4  | F | R thalamus          | Pilocytic astrocytoma                        | Low grade  | NF1 | NEGATIVE |        | Preserved    |           | 1 | 1 | 2 |
| 157 | 21 | F | L temporoparietal   | Pilocytic astrocytoma                        | Low grade  | NF1 | NEGATIVE | Normal | Preserved    |           | 1 | 1 | 1 |
| 158 | 5  | F | cerebellum          | Pilocytic astrocytoma                        | Low grade  | NF1 | NEGATIVE | Long   | Preserved    |           | 1 | 1 | 1 |
| 159 | 3  | F | R optic nerve       | Pilocytic astrocytoma                        | Low grade  | NF1 | NEGATIVE | Normal |              |           | 1 | 1 | 1 |
| 160 | 5  | M | L optic nerve       | Pilocytic astrocytoma                        | Low grade  | NF1 | NEGATIVE | Normal | Preserved    |           | 1 | 1 | 1 |
| 161 | 5  | F | L optic nerve       | Pilocytic astrocytoma                        | Low grade  | NF1 | NEGATIVE | Long   | Preserved    |           | 1 | 1 | 1 |
| 162 | 30 | F | R lateral ventricle | Pilocytic astrocytoma                        | Low grade  | NF1 | NEGATIVE | Normal | Preserved    |           | 1 | 1 | 1 |
| 163 | 24 | M | brainstem           | Pilocytic astrocytoma                        | Low grade  | NF1 |          |        |              |           | 1 | 1 | 1 |
| 164 | 33 | F | Skin-chestwall      | Cutaneous neurofibroma                       | Benign     | NF1 | NEGATIVE | Normal | Preserved    |           |   | 1 | 1 |

|            |    |   |                             |                                    |            |     |          |        |              |   |   |   |
|------------|----|---|-----------------------------|------------------------------------|------------|-----|----------|--------|--------------|---|---|---|
| 164        | 33 | F | Skin-chestwall              | Cutaneous neurofibroma             | Benign     | NF1 | NEGATIVE | Normal | Preserved    |   | 1 | 1 |
| 164        | 33 | F | Skin-chestwall              | Cutaneous neurofibroma             | Benign     | NF1 | NEGATIVE | Normal | Preserved    |   | 1 | 1 |
| 164        | 33 | F | Skin-chestwall              | Cutaneous neurofibroma             | Benign     | NF1 | NEGATIVE | Normal | Preserved    |   | 1 | 1 |
| 164        | 33 | F | Skin-chestwall              | Cutaneous neurofibroma             | Benign     | NF1 | NEGATIVE | Normal | Preserved    |   | 1 | 1 |
| 164        | 33 | F | Skin-chestwall              | Cutaneous neurofibroma             | Benign     | NF1 | NEGATIVE | Normal | Preserved    |   | 1 | 1 |
| 164        | 33 | F | Skin-chestwall              | Cutaneous neurofibroma             | Benign     | NF1 | NEGATIVE | Normal | Preserved    |   | 1 | 1 |
| 164        | 33 | F | Skin-foot                   | Diffuse neurofibroma               | Benign     | NF1 | NEGATIVE | Normal | Preserved    |   | 1 | 1 |
| 164        | 33 | F | Skin-chestwall              | Diffuse neurofibroma               | Benign     | NF1 | NEGATIVE | Normal | Preserved    |   | 1 | 1 |
| <b>164</b> | 30 | F | Buttock                     | Plexiform neurofibroma             | Benign     | NF1 | NEGATIVE | Normal | Preserved    | 1 | 1 | 1 |
| <b>165</b> | 33 | F | skin                        | Cutaneous neurofibroma             | Benign     | NF1 | NEGATIVE | Normal | Preserved    | 1 | 1 | 1 |
| 165        | 33 | F | Skin-cheek                  | Cutaneous neurofibroma             | Benign     | NF1 | NEGATIVE | Normal | Preserved    |   | 1 | 1 |
| 165        | 33 | F | Skin-hand                   | Cutaneous neurofibroma             | Benign     | NF1 | NEGATIVE | Normal | Preserved    |   | 1 | 1 |
| 165        | 33 | F | Skin-hand                   | Cutaneous neurofibroma             | Benign     | NF1 | NEGATIVE | Normal | Preserved    |   | 1 | 1 |
| 165        | 33 | F | Skin-back                   | Diffuse neurofibroma               | Benign     | NF1 | NEGATIVE | Normal | Preserved    |   | 1 | 1 |
| 165        | 33 | F | Skin-trunk                  | Diffuse neurofibroma               | Benign     | NF1 | NEGATIVE | Normal | Preserved    |   | 1 | 1 |
| <b>166</b> | 46 | F | Nerve root                  | Plexiform neurofibroma             | Benign     | NF1 | NEGATIVE | Normal | Preserved    | 1 | 1 | 1 |
| <b>167</b> | 25 | M | Midbrain                    | Pilocytic astrocytoma              | Benign     | NF1 | NEGATIVE | Normal | Preserved    | 1 | 1 | 2 |
| 167        | 29 | M | Posterior fossa             | Pilocytic astrocytoma              | Benign     | NF1 | NEGATIVE | Normal | Preserved    |   |   | 2 |
| <b>168</b> | 22 | F | 4th ventricle               | Rosette forming glioneuronal tumor | Benign     | NF1 | NEGATIVE | Normal | Preserved    | 1 | 1 | 1 |
| <b>169</b> | 10 | F | cerebellum                  | Pilocytic astrocytoma              | Benign     | NF1 | NEGATIVE | Short  | Preserved    | 1 | 1 | 1 |
| <b>170</b> | 20 | M | L anterior neck             | MPNST                              | High grade | NF1 | NEGATIVE | Normal | Partial loss | 1 | 1 | 1 |
| <b>171</b> | 31 | M | Skin-R back                 | Cutaneous neurofibroma             | Benign     | NF1 | NEGATIVE | Normal | Preserved    | 1 | 1 | 1 |
| 171        | 31 | M | Skin-L arm                  | Cutaneous neurofibroma             | Benign     | NF1 | NEGATIVE | Normal | Preserved    |   | 1 | 1 |
| 171        | 31 | M | Skin-R shoulder             | Cutaneous neurofibroma             | Benign     | NF1 | NEGATIVE | Normal | Preserved    |   | 1 | 1 |
| 171        | 31 | M | Skin-L lateral trunk        | Cutaneous neurofibroma             | Benign     | NF1 | NEGATIVE | Normal | Preserved    |   | 1 | 1 |
| 171        | 31 | M | Skin-R chin                 | Cutaneous neurofibroma             | Benign     | NF1 | NEGATIVE | Normal | Preserved    |   | 1 | 1 |
| 171        | 31 | M | Soft tissue-L lateral trunk | Subcutaneous neurofibroma          | Benign     | NF1 | NEGATIVE | Normal | Preserved    |   | 1 | 1 |
| <b>172</b> | 23 | F | Skin-R shoulder             | Cutaneous neurofibroma             | Benign     | NF1 | NEGATIVE | Normal | Preserved    | 1 | 1 | 1 |
| 172        | 23 | F | Skin-L shoulder             | Cutaneous neurofibroma             | Benign     | NF1 | NEGATIVE | Normal | Preserved    |   | 1 | 1 |
| 172        | 23 | F | Skin-L middle back          | Cutaneous neurofibroma             | Benign     | NF1 | NEGATIVE | Normal | Preserved    |   | 1 | 1 |
| 172        | 23 | F | Skin-Right middle back      | Cutaneous neurofibroma             | Benign     | NF1 | NEGATIVE | Normal | Preserved    |   | 1 | 1 |
| 172        | 23 | F | Skin-inferior back          | Cutaneous neurofibroma             | Benign     | NF1 | NEGATIVE | Normal | Preserved    |   | 1 | 1 |
| 172        | 23 | F | Skin-Middle back            | Cutaneous neurofibroma             | Benign     | NF1 | NEGATIVE | Normal | Preserved    |   | 1 | 1 |
| <b>173</b> | 30 | M | Lateral ventricle           | Anaplastic astrocytoma             | High grade | NF1 | POSITIVE | ALT    | Loss         | 1 | 1 | 1 |
| <b>174</b> | 7  | M | Skin-L eyelid               | Juvenile xanthogranuloma           | Benign     | NF1 | NEGATIVE | Short  | Preserved    | 1 | 1 | 1 |
| <b>175</b> | 31 | F | L forearm                   | Plexiform neurofibroma             | Benign     | NF1 | NEGATIVE | Normal | Preserved    | 1 | 1 | 1 |

|     |    |   |                 |                          |            |     |          |        |              |   |   |   |
|-----|----|---|-----------------|--------------------------|------------|-----|----------|--------|--------------|---|---|---|
| 176 | 21 | M | Paraspinal      | Neurofibroma             | Benign     | NF1 | NEGATIVE | Normal | Preserved    | 1 | 1 | 1 |
| 176 | 21 | M | R thigh         | Neurofibroma             | Benign     | NF1 | NEGATIVE | Normal | Preserved    |   | 1 | 1 |
| 177 | 13 | M | L orbit         | Plexiform neurofibroma   | Benign     | NF1 |          |        | Preserved    | 1 | 1 | 1 |
| 178 | 13 | M | L eyelid        | Plexiform neurofibroma   | Benign     | NF1 | NEGATIVE | Normal | Preserved    | 1 | 1 | 1 |
| 179 | 9  | F | L upper eyelid  | Plexiform neurofibroma   | Benign     | NF1 | NEGATIVE | Normal |              | 1 | 1 | 1 |
| 180 | 14 | M | L upper eyelid  | Plexiform neurofibroma   | Benign     | NF1 | NEGATIVE | Normal | Preserved    | 1 | 1 | 1 |
| 181 | 39 | F | l upper eyelid  | Cutaneous neurofibroma   | Benign     | NF1 | NEGATIVE | Normal | Preserved    | 1 | 1 | 1 |
| 182 | 16 | M | R orbit         | Plexiform neurofibroma   | Benign     | NF1 | NEGATIVE | Normal | Preserved    | 1 | 1 | 1 |
| 183 | 61 | M | L upper eyelid  | Localized neurofibroma   | Benign     | NF1 | NEGATIVE | Normal | Preserved    | 1 | 1 | 1 |
| 184 | 23 | F | L orbit         | Diffuse neurofibroma     | Benign     | NF1 | NEGATIVE | Normal | Preserved    | 1 | 1 | 1 |
| 185 | 43 | F | Brain           | Anaplastic astrocytoma   | High grade | NF1 | POSITIVE | ALT    | Loss         | 1 | 1 | 1 |
| 186 | 37 | F | skin-elbow      | Cutaneous neurofibroma   | Benign     | NF1 | NEGATIVE | Normal | Preserved    | 1 | 1 | 1 |
| 186 |    |   | skin-elbow      | Cutaneous neurofibroma   | Benign     | NF1 | NEGATIVE | Normal | Preserved    |   | 1 | 1 |
| 186 |    |   | Skin-chin       | Cutaneous neurofibroma   | Benign     | NF1 | NEGATIVE | Normal | Preserved    |   | 1 | 1 |
| 186 |    |   | Skin-knee       | Cutaneous neurofibroma   | Benign     | NF1 | NEGATIVE | Normal | Preserved    |   | 1 | 1 |
| 186 |    |   | Skin-knee       | Cutaneous neurofibroma   | Benign     | NF1 | NEGATIVE | Normal | Preserved    |   | 1 | 1 |
| 186 |    |   | Skin-leg        | Cutaneous neurofibroma   | Benign     | NF1 | NEGATIVE | Normal | Preserved    |   | 1 | 1 |
| 187 | 1  | M | R arm           | Juvenile xanthogranuloma | Benign     | NF1 | NEGATIVE | Normal | Preserved    | 1 | 1 | 1 |
| 187 |    |   |                 | Juvenile xanthogranuloma | Benign     | NF1 | NEGATIVE | Normal | Preserved    |   | 1 | 1 |
| 188 | 34 | M | Sella           | Glioblastoma             | High grade | NF1 | POSITIVE | ALT    | Preserved    | 1 | 1 | 1 |
| 189 | 44 | F | retroperitoneum | MPNST                    | High grade | NF1 | NEGATIVE | Short  | Preserved    |   | 1 | 1 |
| 189 | 44 | F | L hip-skin      | Diffuse neurofibroma     | Benign     | NF1 | NEGATIVE | Normal |              |   | 1 | 1 |
| 189 | 44 | F | R leg-skin      | Diffuse neurofibroma     | Benign     | NF1 | NEGATIVE | Normal |              |   | 1 | 1 |
| 189 | 44 | F | Liver           | Plexiform neurofibroma   | Benign     | NF1 | NEGATIVE | Normal |              | 1 | 1 | 1 |
| 189 | 44 | F | L adrenal-      | Plexiform neurofibroma   | Benign     | NF1 | NEGATIVE | Normal |              |   | 1 | 1 |
| 190 | 40 | M | R frontal lobe  | Diffuse Astrocytoma      | Low grade  | NF1 |          |        | Partial loss | 1 | 1 | 1 |
| 191 | 18 | M | Pelvis          | MPNST                    | High grade | NF1 | NEGATIVE | Short  | Preserved    | 1 | 1 | 1 |
| 191 | 18 | M | Pelvis          | Plexiform neurofibroma   | Benign     | NF1 | NEGATIVE | Normal | Preserved    |   | 1 | 1 |
| 192 | 58 | M | R arm           | Cutaneous neurofibroma   | Benign     | NF1 | NEGATIVE | Normal | Preserved    | 1 | 1 | 1 |
| 192 | 58 | M | R forehead      | Cutaneous neurofibroma   | Benign     | NF1 | NEGATIVE | Normal | Preserved    |   | 1 | 1 |
| 193 | 53 | M | L thigh         | ANNUBP                   | Benign     | NF1 | NEGATIVE | Normal | Preserved    |   | 1 | 1 |
| 193 | 53 | M | Tibial nerve    | Schwannoma               | Benign     | NF1 | NEGATIVE | Normal | Preserved    |   | 1 | 1 |
| 193 | 55 | M | Chest wall      | MPNST                    | High grade | NF1 | NEGATIVE | Short  |              | 1 | 1 | 1 |
| 194 | 53 | F | Lung            | MPNST                    | High grade | NF1 | NEGATIVE | Short  | Preserved    | 1 | 1 | 3 |
| 195 | 25 | F | R neck          | Plexiform neurofibroma   | Benign     | NF1 | NEGATIVE | Normal | Preserved    | 1 | 1 | 1 |
| 196 | 41 | M | L arm           | Plexiform neurofibroma   | Benign     | NF1 | NEGATIVE | Normal | Partial loss |   | 1 | 1 |

|     |    |   |                 |                                    |            |          |          |        |              |           |   |   |
|-----|----|---|-----------------|------------------------------------|------------|----------|----------|--------|--------------|-----------|---|---|
| 196 | 41 | M | R forearm       | Cutaneous neurofibroma             | Benign     | NF1      | NEGATIVE | Normal | Preserved    |           | 1 | 1 |
| 196 | 41 | M | R median nerve  | Localized intraneural neurofibroma | Benign     | NF1      | NEGATIVE | Normal | Preserved    | 1         | 1 | 1 |
| 196 | 41 | M |                 | Plexiform neurofibroma             | Benign     | NF1      | NEGATIVE | Normal |              |           | 1 | 1 |
| 197 | 59 | M | duodenum        | Neuroendocrine tumor               |            | NF1      | NEGATIVE | Normal |              | 1         | 1 | 1 |
| 198 | 52 | F | ampulla         | Neuroendocrine tumor               | Low grade  | NF1      | NEGATIVE | Short  |              | 1         | 1 | 1 |
| 199 | 61 | F | duodenum        | Neuroendocrine tumor               | Low grade  | NF1      | NEGATIVE | Normal |              | 1         | 1 | 1 |
| 200 | 46 | M | duodenum        | Neuroendocrine tumor               |            | NF1      | NEGATIVE | Short  |              | 1         | 1 | 1 |
| 201 | 40 | M | ampulla         | Neuroendocrine tumor               | Low grade  | NF1      | NEGATIVE | Short  |              | 1         | 1 | 1 |
| 202 | 55 | M | ampulla         | Neuroendocrine tumor               | Low grade  | NF1      | NEGATIVE | Short  |              | 1         | 1 | 1 |
| 203 | 42 | F | retroperitoneal | MPNST                              | High grade | NF1      |          |        | Preserved    | Preserved | 1 | 1 |
| 204 | 29 | F | thigh           | MPNST                              | High grade | NF1      | POSITIVE | ALT    | Preserved    | Preserved | 1 | 1 |
| 205 | 40 | M | retroperitoneal | MPNST                              | Low grade  | NF1      | NEGATIVE |        | Preserved    | Preserved | 1 | 1 |
| 206 | 44 | M | sacrum          | MPNST                              | High grade | NF1      | NEGATIVE |        | Preserved    | Preserved | 1 | 1 |
| 207 | 31 | M | thigh           | MPNST                              | High grade | NF1      | NEGATIVE |        |              | Preserved | 1 | 1 |
| 208 | 45 | F | thigh           | MPNST                              | High grade | NF1      | POSITIVE | ALT    | Preserved    | Preserved | 1 | 1 |
| 209 | 49 | F | spine           | MPNST                              | High grade | NF1      | NEGATIVE |        | Preserved    | Preserved | 1 | 1 |
| 210 | 43 | F | brachial plexus | MPNST                              | High grade | NF1      | NEGATIVE |        | Preserved    | Preserved | 1 | 1 |
| 211 | 11 | M | retroperitoneal | MPNST                              | High grade | NF1      | NEGATIVE |        | Partial loss | Preserved | 1 | 1 |
| 212 | 43 | M | retroperitoneal | MPNST                              | High grade | NF1      | POSITIVE | ALT    | Partial loss | Preserved | 1 | 1 |
| 213 | 27 | F | retroperitoneal | MPNST                              | High grade | NF1      | NEGATIVE |        | Partial loss | Preserved | 1 | 1 |
| 214 | 60 | F | face            | MPNST                              | High grade | NF1      | NEGATIVE |        | Preserved    | Preserved | 1 | 1 |
| 215 | 23 | M | arm             | MPNST                              | High grade | NF1      | NEGATIVE |        | Preserved    | Preserved | 1 | 1 |
| 216 | 31 | M | thigh           | MPNST                              | High grade | NF1      | NEGATIVE |        | Partial loss | Preserved | 1 | 1 |
| 217 | 47 | F | spine           | MPNST                              | High grade | NF1      | NEGATIVE |        | Preserved    | Preserved | 1 | 1 |
| 218 | 34 | F | tibia           | MPNST                              | Low grade  | NF1      | NEGATIVE |        | Preserved    | Preserved | 1 | 1 |
| 219 | 22 | M | spine           | MPNST                              | Low grade  | NF1      | NEGATIVE |        | Preserved    | Preserved | 1 | 1 |
| 220 | 49 | F | sacrum          | MPNST                              | High grade | NF1      | POSITIVE | ALT    | Preserved    | Preserved | 1 | 1 |
| 221 | 33 | F | back            | MPNST                              | High grade | NF1      | NEGATIVE |        | Preserved    | Preserved | 1 | 1 |
| 222 | 43 | M | forearm         | MPNST                              | High grade | NF1      | NEGATIVE |        | Partial loss | Preserved | 1 | 1 |
| 223 | 35 | F | neck            | MPNST                              | High grade | NF1      | NEGATIVE |        | Partial loss | Preserved | 1 | 1 |
| 224 | 33 | M | shoulder        | MPNST                              | High grade | NF1      | NEGATIVE |        | Preserved    | Preserved | 1 | 1 |
| 225 | 38 | F | sacrum          | MPNST                              | High grade | NF1      | NEGATIVE |        | Partial loss | Preserved | 1 | 1 |
| 226 | 29 | M | neck            | MPNST                              | High grade | NF1      | NEGATIVE |        | Preserved    | Preserved | 1 | 1 |
| 227 | 37 | M | spine           | MPNST                              | High grade | NF1      | NEGATIVE |        |              | Preserved | 1 | 1 |
| 228 | 13 | F | mediastinum     | MPNST                              | High grade | NF1      | NEGATIVE |        | Preserved    | Preserved | 1 | 1 |
| 229 | 42 | F | sacrum          | MPNST                              | High grade | Sporadic | NEGATIVE |        | Preserved    | Preserved | 1 | 1 |

|     |    |   |                 |       |            |          |          |     |              |              |   |   |   |
|-----|----|---|-----------------|-------|------------|----------|----------|-----|--------------|--------------|---|---|---|
| 230 | 33 | M | mediastinum     | MPNST | High grade | Sporadic | POSITIVE | ALT | Loss         | Preserved    | 1 | 1 |   |
| 231 | 35 | M | thigh           | MPNST | High grade | .        | NEGATIVE |     | Preserved    | Preserved    | 1 | 1 |   |
| 232 | 53 | F | brachial plexus | MPNST | High grade | Sporadic | NEGATIVE |     | Partial loss | Preserved    | 1 | 1 |   |
| 233 | 65 | F | chest wall      | MPNST | High grade | Sporadic |          |     |              |              | 1 | 1 |   |
| 234 | 49 | M | brachial plexus | MPNST | High grade | Sporadic | NEGATIVE |     | Partial loss | Partial loss | 1 | 1 |   |
| 235 | 43 | F | thigh           | MPNST | High grade | Sporadic |          |     |              |              | 1 | 1 |   |
| 236 | 57 | F | thigh           | MPNST | High grade | Sporadic | NEGATIVE |     | Preserved    | Preserved    | 1 | 1 |   |
| 237 | 72 | F | thigh           | MPNST | High grade | Sporadic | NEGATIVE |     | Preserved    | Partial loss | 1 | 1 |   |
| 238 | 23 | F | calf            | MPNST | High grade | Sporadic | NEGATIVE |     | Preserved    | Preserved    | 1 | 1 |   |
| 239 | 36 | F | retroperitoneal | MPNST | High grade | Sporadic | POSITIVE | ALT | Preserved    | Preserved    | 1 | 1 |   |
| 240 | 32 | F | retroperitoneal | MPNST | High grade | Sporadic | NEGATIVE |     | Preserved    | Preserved    | 1 | 1 |   |
| 241 | 49 | M | ST-neck         | MPNST | High grade |          | NEGATIVE |     |              |              | 1 | 1 | 1 |
| 242 | 28 | F | ST-neck         | MPNST | High grade |          | NEGATIVE |     |              |              | 1 | 1 | 1 |
| 243 | 27 | F | ST-chest wall   | MPNST | High grade |          | POSITIVE | ALT |              |              | 1 | 1 | 1 |
| 244 | 77 | M | ST-axilla       | MPNST | Low grade  |          | NEGATIVE |     |              |              | 1 | 1 | 1 |
| 245 | 37 | F | ST-pelvis       | MPNST | High grade |          | NEGATIVE |     |              |              | 1 | 1 | 1 |
| 246 | 44 | M | ST-neck         | MPNST | High grade |          | NEGATIVE |     |              |              | 1 | 1 | 1 |
| 247 | 66 | M | Lung-met        | MPNST | High grade |          | NEGATIVE |     |              |              | 1 | 1 | 3 |
| 248 | 43 | F | ST-brachial p.  | MPNST | High grade |          | NEGATIVE |     |              |              | 1 | 1 | 1 |
| 249 | 37 | F | ST-pelvis       | MPNST | High grade |          | NEGATIVE |     |              |              | 1 | 1 | 2 |
| 250 | 39 | M | ST-pelvis       | MPNST | High grade |          | NEGATIVE |     |              |              | 1 | 1 | 1 |
| 251 | 76 | M | ST-paraspinal   | MPNST | High grade |          | POSITIVE | ALT |              |              | 1 | 1 | 1 |
| 252 | 73 | M | ST-shoulder     | MPNST | High grade |          | NEGATIVE |     |              |              | 1 | 1 | 1 |
| 253 | 34 | F | ST-thigh        | MPNST | High grade |          | NEGATIVE |     |              |              | 1 | 1 | 1 |
| 254 | 51 | F | ST-chest wall   | MPNST | High grade |          | NEGATIVE |     |              |              | 1 | 1 | 1 |
| 255 | 36 | F | ST-chest wall   | MPNST | High grade |          | NEGATIVE |     |              |              | 1 | 1 | 1 |
| 256 | 59 | M | ST-arm          | MPNST | High grade |          | POSITIVE | ALT |              |              | 1 | 1 | 1 |
| 257 | 38 | M | ST-pelvis       | MPNST | High grade |          | NEGATIVE |     |              |              | 1 | 1 | 1 |
| 258 | 26 | F | ST-arm          | MPNST | High grade |          | NEGATIVE |     |              |              | 1 | 1 | 2 |
| 259 | 56 | M | ST-chest wall   | MPNST | High grade |          | POSITIVE | ALT |              |              | 1 | 1 | 1 |
| 260 | 74 | F | ST-thigh        | MPNST | High grade |          | POSITIVE | ALT |              |              | 1 | 1 | 2 |
| 261 | 23 | M | ST-mediastinum  | MPNST | High grade |          | NEGATIVE |     |              |              | 1 | 1 | 1 |
| 262 | 23 | F | ST-infratemp.   | MPNST | High grade |          | NEGATIVE |     |              |              | 1 | 1 | 1 |
| 263 | 16 | F | Lymph node      | MPNST | High grade |          | NEGATIVE |     |              |              | 1 | 1 | 3 |
| 264 | 51 | F | Lymph node      | MPNST | High grade |          | POSITIVE | ALT |              |              | 1 | 1 | 3 |
| 265 | 15 | M | ST-inguinal     | MPNST | High grade | NFI      | NEGATIVE |     |              |              | 1 | 1 | 1 |

|     |    |   |                    |                   |            |     |          |     |   |   |   |
|-----|----|---|--------------------|-------------------|------------|-----|----------|-----|---|---|---|
| 266 | 43 | M | ST-paraspinal      | MPNST             | High grade |     | POSITIVE | ALT | 1 | 1 | 1 |
| 267 | 32 | M | ST-chest wall      | MPNST             | High grade | NF1 | NEGATIVE |     | 1 | 1 | 1 |
| 268 | 24 | F | ST-pelvis          | MPNST             | High grade | NF1 | NEGATIVE |     | 1 | 1 | 1 |
| 269 | 77 | F | ST-orbit           | MPNST             | Low grade  |     | POSITIVE | ALT | 1 | 1 | 1 |
| 270 | 29 | F | ST-thigh           | MPNST             | High grade | NF1 | NEGATIVE |     | 1 | 1 | 1 |
| 271 | 34 | F | ST-leg             | MPNST             | High grade |     | NEGATIVE |     | 1 | 1 | 1 |
| 272 | 31 | M | ST-retroperitoneum | MPNST             | High grade | NF1 | NEGATIVE |     | 1 | 1 | 1 |
| 273 | 33 | M | Skin-clavicle      | MPNST             | Low grade  |     | NEGATIVE |     | 1 | 1 | 1 |
| 274 | 71 | F | ST-abd.            | MPNST             | High grade | NF1 | NEGATIVE |     | 1 | 1 | 1 |
| 275 | 21 | F | ST-paraspinal      | MPNST             | High grade | NF1 | NEGATIVE |     | 1 | 1 | 1 |
| 276 | 16 | M | ST-mediast.        | MPNST             | Low grade  | NF1 | NEGATIVE |     | 1 | 1 | 1 |
| 277 | 33 | F | ST-brach. pl.      | MPNST             | High grade | NF1 | NEGATIVE |     | 1 | 1 | 1 |
| 278 | 48 | F | ST-buttock         | MPNST             | High grade |     | NEGATIVE |     | 1 | 1 | 1 |
| 279 | 65 | F | ST-peroneal n.     | MPNST             | Low grade  |     | NEGATIVE |     | 1 | 1 | 1 |
| 280 | 3  | M | ST-forearm         | MPNST             | High grade |     | NEGATIVE |     | 1 | 1 | 1 |
| 281 | 48 | M | Diaphragm          | MPNST             | High grade |     | NEGATIVE |     | 1 | 1 | 1 |
| 282 | 52 | M | ST-paraspinal      | MPNST             | High grade |     | NEGATIVE |     | 1 | 1 | 1 |
| 283 | 62 | F | ST-brach. pl.      | MPNST             | High grade |     | NEGATIVE |     | 1 | 1 | 1 |
| 284 | 24 | M | ST-neck            | MPNST             | High grade | NF1 | NEGATIVE |     | 1 | 1 | 1 |
| 285 | 68 | M | ST-arm             | MPNST             | High grade |     | NEGATIVE |     | 1 | 1 | 1 |
| 286 | 42 | F | ST-brach. pl.      | MPNST             | High grade |     | NEGATIVE |     | 1 | 1 | 1 |
| 287 | 47 | M | ST-mediast.        | MPNST             | High grade |     | NEGATIVE |     | 1 | 1 | 1 |
| 288 | 25 | M | ST-retroperit.     | MPNST             | High grade | NF1 | NEGATIVE |     | 1 | 1 | 1 |
| 289 | 43 | M | ST-back            | MPNST             | High grade | NF1 | NEGATIVE |     | 1 | 1 | 1 |
| 290 | 33 | F | ST-back            | MPNST             | High grade | NF1 | NEGATIVE |     | 1 | 1 | 1 |
| 291 | 40 | M | ST-back            | MPNST             | High grade |     | NEGATIVE |     | 1 | 1 | 1 |
| 292 | 31 | F | ST-thigh           | MPNST             | High grade | NF1 | NEGATIVE |     | 1 | 1 | 1 |
| 293 | 33 | M | ST-retroperit.     | MPNST             | High grade | NF1 | POSITIVE | ALT | 1 | 1 | 1 |
| 293 | 33 | M | ST-retroperit.     | MPNST             | High grade | NF1 | POSITIVE | ALT |   |   | 2 |
| 294 | 47 | F | ST-brach. pl.      | Epithelioid MPNST | High grade |     | NEGATIVE |     | 1 | 1 | 1 |
| 295 | 74 | F | ST-brach. pl.      | MPNST             | High grade |     | NEGATIVE |     | 1 | 1 | 1 |
| 296 | 49 | M | ST-abdomen         | MPNST             | High grade | NF1 | NEGATIVE |     | 1 | 1 | 1 |
| 296 | 51 | M | ST-axilla          | MPNST             | High grade | NF1 | NEGATIVE |     |   | 1 | 1 |
| 296 | 51 | M | ST-axilla          | MPNST             | High grade | NF1 | NEGATIVE |     |   |   | 2 |
| 297 | 30 | M | ST-neck            | MPNST             | High grade |     | NEGATIVE |     | 1 | 1 | 1 |
| 297 | 30 | M | ST-neck            | MPNST             | High grade |     | NEGATIVE |     |   |   | 2 |



|     |    |   |                 |       |            |     |          |     |   |   |   |
|-----|----|---|-----------------|-------|------------|-----|----------|-----|---|---|---|
| 298 | 38 | F | ST-femoral      | MPNST | High grade |     | NEGATIVE |     | 1 | 1 | 1 |
| 298 | 43 | F | ST-femoral      | MPNST | High grade |     | NEGATIVE |     |   |   |   |
| 299 | 46 | M | ST-pelvis       | MPNST | Low grade  |     | NEGATIVE |     | 1 | 1 | 1 |
| 300 | 41 | F | ST-thigh        | MPNST | High grade |     | NEGATIVE |     |   |   | 2 |
| 300 | 37 | F | ST-thigh        | MPNST | Low grade  |     | NEGATIVE |     | 1 | 1 | 1 |
| 300 | 39 | F | ST-groin        | MPNST | Low grade  |     | NEGATIVE |     |   |   | 2 |
| 301 | 25 | M | ST-chest wall   | MPNST | High grade | NF1 | NEGATIVE |     |   | 1 | 1 |
| 301 | 21 | M | ST-sciatic n.   | MPNST | Low grade  | NF1 |          |     | 1 | 1 | 1 |
| 302 | 46 | F | ST-thigh        | MPNST | High grade |     | NEGATIVE |     | 1 | 1 | 1 |
| 302 | 46 | F | Lung-met        | MPNST | High grade |     | NEGATIVE |     |   | 1 | 3 |
| 303 | 58 | M | ST-femoral      | MPNST | High grade |     | POSITIVE | ALT | 1 | 1 | 1 |
| 303 | 58 | M | ST-femoral      | MPNST | High grade |     | POSITIVE | ALT |   |   | 2 |
| 304 | 81 | F | ST-leg          | MPNST | High grade |     | POSITIVE | ALT | 1 | 1 | 1 |
| 304 | 86 | F | ST-leg          | MPNST | High grade |     | POSITIVE | ALT |   |   | 2 |
| 304 | 86 | F | ST-groin        | MPNST | High grade |     | POSITIVE | ALT |   |   | 3 |
| 305 | 42 | M | ST-sciatic n.   | MPNST | High grade |     | NEGATIVE |     | 1 | 1 | 1 |
| 306 | 60 | F | ST-infratemp.   | MPNST | High grade |     | NEGATIVE |     | 1 | 1 | 1 |
| 306 | 60 | F | ST-shoulder-met | MPNST | High grade |     | NEGATIVE |     |   |   | 3 |
| 307 | 49 | F | ST-arm          | MPNST | High grade |     | POSITIVE | ALT | 1 | 1 | 1 |
| 307 | 49 | F | Pleura-met      | MPNST | High grade |     | NEGATIVE |     |   | 1 | 3 |
| 308 | 18 | M | ST-buttock      | MPNST | High grade |     | NEGATIVE |     |   |   | 2 |
| 308 | 17 | M | ST-buttock      | MPNST | Low grade  |     | NEGATIVE |     | 1 | 1 | 2 |
| 309 | 35 | M | ST-chest wall   | MPNST | High grade |     | NEGATIVE |     | 1 | 1 | 1 |
| 309 | 37 | M | Bone-met        | MPNST | High grade |     | NEGATIVE |     |   | 1 | 2 |
| 310 | 46 | F | ST-arm          | MPNST | High grade |     | POSITIVE | ALT | 1 | 1 | 1 |
| 311 | 23 | F | ST-thigh        | MPNST | High grade | NF1 | NEGATIVE |     | 1 | 1 | 1 |
| 312 | 48 | M | ST-buttock      | MPNST | High grade |     | POSITIVE | ALT | 1 | 1 | 1 |
| 313 | 59 | F | ST-chest wall   | MPNST | High grade | NF1 | NEGATIVE |     |   | 1 | 1 |
| 314 | 68 | M | ST-thigh        | MPNST | High grade |     | POSITIVE | ALT | 1 | 1 | 1 |
| 315 | 21 | F | ST-skull base   | MPNST | Low grade  | NF1 | NEGATIVE |     | 1 | 1 | 1 |
| 316 | 34 | M | ST-arm          | MPNST | High grade |     | NEGATIVE |     |   |   | 1 |
| 316 | 34 | M | ST-paraspinal   | MPNST | High grade |     | NEGATIVE |     |   |   | 1 |
| 317 | 1  | F | ST-paraspinal   | MPNST | High grade |     | NEGATIVE |     | 1 | 1 | 1 |
| 318 | 9  | M | ST-leg          | MPNST | High grade |     | NEGATIVE |     |   |   | 1 |
| 319 | 17 | F | Lung            | MPNST | High grade | NF1 |          |     |   |   | 3 |
| 319 | 16 | F | ST-thigh        | MPNST | High grade | NF1 | NEGATIVE |     | 1 | 1 | 1 |

|     |    |   |                  |                                      |            |     |          |        |           |   |   |
|-----|----|---|------------------|--------------------------------------|------------|-----|----------|--------|-----------|---|---|
| 320 | 13 | F | Lung + parasp.   | MPNST                                | High grade | NF1 | NEGATIVE |        |           | 1 | 3 |
| 321 | 12 | F | ST-back          | MPNST                                | High grade | NF1 | NEGATIVE |        |           | 1 | 1 |
| 322 | 81 | M | ST-thigh         | Epithelioid MPNST                    | High grade |     | POSITIVE | ALT    |           |   | 1 |
| 323 | 24 | F | ST-abd.          | MPNST                                | High grade | NF1 | POSITIVE | ALT    |           | 1 | 1 |
| 323 | 24 | F | ST-abd.          | MPNST                                | High grade | NF1 | POSITIVE | ALT    |           |   | 2 |
| 323 | 25 | F | Bowel            | MPNST                                | High grade | NF1 | POSITIVE | ALT    |           |   | 2 |
| 323 | 26 | F | Bowel            | MPNST                                | High grade | NF1 | POSITIVE | ALT    |           |   | 2 |
| 324 | 11 | F | ST-thigh         | MPNST                                | Low grade  | NF1 | NEGATIVE |        |           | 1 | 1 |
| 324 | 13 | F | ST-thigh         | MPNST                                | Low grade  | NF1 | NEGATIVE |        |           |   | 2 |
| 325 | 36 | F | ST-brach. pl.    | MPNST                                | High grade |     | NEGATIVE |        |           |   | 1 |
| 326 | 17 | F | ST-paraspinal    | MPNST                                | High grade |     | NEGATIVE |        |           | 1 | 1 |
| 326 | 17 | F | ST-paraspinal    | MPNST                                | High grade |     | NEGATIVE |        |           |   | 2 |
| 326 | 18 | F | ST-paraspinal    | MPNST                                | High grade |     | NEGATIVE |        |           |   | 2 |
| 326 | 18 | F | ST-paraspinal    | MPNST                                | High grade |     | NEGATIVE |        |           |   | 2 |
| 326 | 18 | F | ST-paraspinal    | MPNST                                | High grade |     | NEGATIVE |        |           |   | 2 |
| 327 | 37 | M | buttock          | Massive soft tissue neurofibroma     | Benign     | NF1 | NEGATIVE | Normal | Preserved | 1 | 1 |
| 328 | 10 | F | Scalp            | MPNST with divergent differentiation | High grade | NF1 | NEGATIVE | Normal | Preserved | 1 | 1 |
| 329 | 14 | M | third ventricle  | Pilocytic astrocytoma                | Low grade  | NF1 | NEGATIVE | Long   | Preserved | 1 | 1 |
| 330 | 24 | M | cerebellum       | Pilocytic astrocytoma with anaplasia | High grade | NF1 | POSITIVE | ALT    | Loss      | 1 | 1 |
| 331 | 11 | F | R occipital lobe | Pilocytic astrocytoma with anaplasia | High grade | NF1 | NEGATIVE |        | Preserved | 1 | 1 |
| 332 | 18 | M | L parietal lobe  | Pilocytic astrocytoma with anaplasia | High grade | NF1 | NEGATIVE |        | Preserved | 1 | 1 |
| 333 | 21 | M | small bowel      | GIST                                 | Low grade  | NF1 | NEGATIVE | Normal |           | 1 | 1 |
| 334 | 35 | M | CP angle         | Pilocytic astrocytoma with anaplasia | High grade | NF1 | POSITIVE | ALT    | Loss      | 1 | 1 |
| 335 | 18 | F | breast           | Malignant Phylloides tumor           | High grade | NF1 | POSITIVE | ALT    | Preserved |   |   |
| 336 | 79 | F | Stomach          | Gastric Schwannoma                   | Benign     | NF1 | NEGATIVE | Normal | Preserved | 1 | 1 |
| 337 | 79 | F | Stomach          | GIST                                 | Low grade  | NF1 | NEGATIVE | Short  | Preserved |   | 1 |

**Table S2. Next generation sequencing results of ALT positive NF1-associated gliomas and MPNST (n=9)**

| ID             | Chr:Pos         | Base Change                   | Region   | Gene     | CDS                              | AA_change        | Alt+,Alt-<br>/Ref+,Ref- | %VAF  | %RAF  | Avg<br>Cov        |
|----------------|-----------------|-------------------------------|----------|----------|----------------------------------|------------------|-------------------------|-------|-------|-------------------|
| CASE 78-MPNST  | chr17:29508438  | A>G                           | splicing | NF1      | NM_000267 : c.587-2A>G           |                  | 27,11/31,23             | 41.3  | 58.7  | 512.31            |
| CASE 78-MPNST  | chr4:87968606   | C>G                           | exonic   | AFF1     | NM_001166693.2 : c.C919G         | p.Q307E          | 9,15/111,121            | 9.38  | 90.62 | 1975.36           |
| CASE 78-MPNST  | chr18:50450208  | G>A                           | exonic   | DCC      | NM_005215 : c.G829A              | p.E277K          | 9,16/22,20              | 37.31 | 62.69 | 553.58            |
| CASE 78-MPNST  | chr11:108788634 | G>GTGATGA                     | exonic   | DDX10    | NM_004398 : c.2363_2364insTGATGA | p.D788_G789insDD | 18,11/57,42             | 22.66 | 77.34 | 544.29            |
| CASE 78-MPNST  | chr4:153253751  | C>T                           | exonic   | FBXW7    | NM_033632 : c.G982A              | p.E328K          | 7,7/52,61               | 11.02 | 88.98 | 682.26            |
| CASE 78-MPNST  | chr5:180053190  | G>C                           | exonic   | FLT4     | NM_182925 : c.C1179G             | p.S393R          | 46,49/42,49             | 51.08 | 48.92 | 888.36            |
| CASE 78-MPNST  | chr2:240002870  | C>T                           | exonic   | HDAC4    | NM_006037 : c.G2656A             | p.V886M          | 69,60/49,51             | 56.33 | 43.67 | 988.56            |
| CASE 78-MPNST  | chr17:45377872  | C>T                           | exonic   | ITGB3    | NM_000212 : c.C1942T             | p.R648W          | 32,32/34,28             | 50.79 | 49.21 | 1071.05           |
| CASE 78-MPNST  | chr6:15496478   | C>T                           | exonic   | JARID2   | NM_004973 : c.C1022T             | p.T341M          | 32,31/36,40             | 45.32 | 54.68 | 1499.22           |
| CASE 78-MPNST  | chr19:36214639  | C>T                           | exonic   | KMT2B    | NM_014727 : c.C3065T             | p.T1022M         | 58,31/38,32             | 55.97 | 44.03 | 633.4             |
| CASE 78-MPNST  | chr3:46480815   | C>T                           | exonic   | LTF      | NM_002343 : c.G1880A             | p.R627H          | 51,33/42,30             | 53.85 | 46.15 | 844.98            |
| CASE 78-MPNST  | chr17:5442764   | C>G                           | exonic   | NLRP1    | NM_033004 : c.G2841C             | p.R947S          | 67,56/45,39             | 59.42 | 40.58 | 834.55            |
| CASE 78-MPNST  | chr1:186644489  | C>T                           | exonic   | PTGS2    | NM_000963 : c.G1297A             | p.V433I          | 22,28/23,37             | 45.45 | 54.55 | 868.82            |
| CASE 78-MPNST  | chr8:145741989  | G>A                           | exonic   | RECQL4   | NM_004260 : c.C514T              | p.L172F          | 46,58/45,42             | 54.45 | 45.55 | 1068.43           |
| CASE 78-MPNST  | chr8:145743144  | C>T                           | exonic   | RECQL4   | NM_004260 : c.G25A               | p.E9K            | 4,11/3,10               | 53.57 | 46.43 | 107.88            |
| CASE 78-MPNST  | chr18:42281466  | G>A                           | exonic   | SETBP1   | NM_015559 : c.G155A              | p.G52E           | 72,66/54,57             | 55.42 | 44.58 | 1090.07           |
| CASE 78-MPNST  | chr1:144994694  | T>C                           | exonic   | PDE4DIP  | NM_014644 : c.38A>G              | p.N13S           | 41,42/224,231           | 15.43 | 84.57 | 2336.7            |
| ID             | Chr:Pos         | Base Change                   | Region   | Gene     | CDS                              | AA_change        | Alt+,Alt-<br>/Ref+,Ref- | %VAF  | %RAF  | Avg<br>Cov        |
| CASE 53-MPNST  | chrX:76937963   | G>C                           | exonic   | ATRX     | NM_000489.4 : c.C2785G           | p.Q929E          | 244,313/129,134         | 67.93 | 32.07 | 1223.62           |
| CASE 53-MPNST  | chr2:29606597   | C>A                           | splicing | ALK      | NM_004304.4 : c.1282+1G>T        | p.?              | 194,120/316,235         | 36.3  | 63.7  | 958.39            |
| CASE 53-MPNST  | chr17:29585446  | T>TCACC                       | exonic   | NF1      | NM_000267.3 : c.4200_4204insCACC | p.Y1401Tfs*2     | 198,235/426,547         | 30.8  | 69.2  | 1067.92           |
| CASE 53-MPNST  | chr17:7577139   | G>A                           | exonic   | TP53     | NM_000546.5 : c.C799T            | p.R267W          | 77,184/115,225          | 43.43 | 56.57 | 1135.22           |
| CASE 53-MPNST  | chr16:2134269   | C>T                           | exonic   | TSC2     | NM_000548.4 : c.C4046T           | p.A1349V         | 15,10/201,172           | 6.28  | 93.72 | 558.6             |
| CASE 53-MPNST  | chrX:39933843   | G>T                           | exonic   | BCOR     | NM_017745.5 : c.C756A            | p.Y252*          | 135,153/294,260         | 34.2  | 65.8  | 1123.94           |
| CASE 53-MPNST  | chr12:121881950 | C>G                           | exonic   | KDM2B    | NM_032590.4 : c.G2316C           | p.E772D          | 286,246/238,226         | 53.41 | 46.59 | 920.01            |
| CASE 53-MPNST  | chr5:176637570  | G>A                           | exonic   | NSD1     | NM_022455.4 : c.G2170A           | p.E724K          | 132,110/390,415         | 23.11 | 76.89 | 1342.3            |
| CASE 53-MPNST  | chr8:48815306   | C>T                           | exonic   | PRKDC    | NM_006904.6 : c.G3092A           | p.R1031Q         | 59,82/273,350           | 18.46 | 81.54 | 964.06            |
| CASE 53-MPNST  | chr9            |                               |          | CDKN2A/B |                                  |                  |                         |       |       | Homozygous loss   |
| CASE 53-MPNST  | chr17           |                               |          | TP53     |                                  |                  |                         |       |       | Heterozygous loss |
| ID             | Chr:Pos         | Base Change                   | Region   | Gene     | CDS                              | AA_change        | Alt+,Alt-<br>/Ref+,Ref- | %VAF  | %RAF  | Avg<br>Cov        |
| CASE 110-MPNST | chr1:40366764   | GAGCGAGCCGGTCTCACAGCTCTCTCC>G | exonic   | MYCL     | NM_001033082.2 : c.405_432del    | p.E136Lfs*59     | 5,5/70,69               | 6.71  | 93.29 | 555.99            |

|                |                 |                         |          |                |                           |              |             |       |       |         |
|----------------|-----------------|-------------------------|----------|----------------|---------------------------|--------------|-------------|-------|-------|---------|
| CASE 110-MPNST | chr11:108546344 | G>A                     | exonic   | DDX10          | NM_004398 : c.G269A       | p.R90H       | 12,5/17,13  | 36.17 | 63.83 | 246.24  |
| CASE 110-MPNST | chr11:119167694 | G>T                     | exonic   | CBL            | NM_005188 : c.G2103T      | p.M70I       | 16,11/11,19 | 47.37 | 52.63 | 371.64  |
| CASE 110-MPNST | chr11:94180441  | C>T                     | exonic   | MRE11A         | NM_005591 : c.G1727A      | p.R576Q      | 15,14/20,15 | 45.31 | 54.69 | 536.91  |
| CASE 110-MPNST | chr13:103492133 | C>T                     | exonic   | BIVM-<br>ERCC5 | NM_001204425 : c.C1430T   | p.S477L      | 17,22/18,23 | 48.75 | 51.25 | 998.43  |
| CASE 110-MPNST | chr15:91346819  | G>A                     | exonic   | BLM            | NM_000057 : c.G3427A      | p.E1143K     | 13,14/23,25 | 36    | 64    | 571.56  |
| CASE 110-MPNST | chr16:2983556   | G>A                     | exonic   | FLYWCH1        | NM_032296 : c.G1219A      | p.E407K      | 20,21/42,48 | 31.3  | 68.7  | 925.6   |
| CASE 110-MPNST | chr16:68772311  | A>G                     | exonic   | CDH1           | NM_004360 : c.A160G       | p.R54G       | 25,20/21,34 | 45    | 55    | 386.4   |
| CASE 110-MPNST | chr16:9857094   | T>C                     | exonic   | GRIN2A         | NM_000833 : c.A4307G      | p.N1436S     | 9,8/17,19   | 32.08 | 67.92 | 620.08  |
| CASE 110-MPNST | chr17:29677200  | G>A                     | splicing | NF1            | NM_000267 : c.7259-1G>A   |              | 12,10/8,8   | 57.89 | 42.11 | 522.21  |
| CASE 110-MPNST | chr17:5463285   | G>A                     | exonic   | NLRP1          | NM_033004 : c.C731T       | p.A244V      | 7,7/42,44   | 14    | 86    | 687.81  |
| CASE 110-MPNST | chr17:75478271  | C>T                     | exonic   | SEPT9          | NM_001113491.1 : c.767C>T | p.P256L      | 85,78/88,82 | 48.95 | 51.05 | 1507.52 |
| CASE 110-MPNST | chr17:76212770  | G>A                     | exonic   | BIRC5          | NM_001168 : c.G247A       | p.G83S       | 21,27/27,48 | 39.02 | 60.98 | 756.65  |
| CASE 110-MPNST | chr18:59221719  | G>T                     | exonic   | CDH20          | NM_031891 : c.G2197T      | p.A733S      | 31,29/49,46 | 38.71 | 61.29 | 940.94  |
| CASE 110-MPNST | chr2:202123045  | G>T                     | exonic   | CASP8          | NM_001080125 : c.G91T     | p.V31L       | 26,24/64,52 | 30.12 | 69.88 | 848.56  |
| CASE 110-MPNST | chr2:216288177  | T>C                     | exonic   | FN1            | NM_212482 : c.A1289G      | p.N430S      | 6,7/20,21   | 24.07 | 75.93 | 378.7   |
| CASE 110-MPNST | chr2:216299526  | T>C                     | exonic   | FN1            | NM_212482 : c.A170G       | p.K57R       | 20,42/13,13 | 70.45 | 29.55 | 806.6   |
| CASE 110-MPNST | chr3:30691871   | GA>G                    | exonic   | TGFBR2         | NM_003242 : c.374delA     | p.K128Sfs*35 | 10,15/54,62 | 17.73 | 82.27 | 1590.71 |
| CASE 110-MPNST | chr3:52643618   | G>A                     | exonic   | PBRM1          | NM_018313 : c.C2278T      | p.R760C      | 7,7/18,21   | 26.42 | 73.58 | 800.04  |
| CASE 110-MPNST | chr5:149503816  | C>T                     | exonic   | PDGFRB         | NM_002609 : c.G2020A      | p.G674R      | 26,28/40,44 | 39.13 | 60.87 | 853.42  |
| CASE 110-MPNST | chr5:180036005  | G>C                     | exonic   | FLT4           | NM_182925 : c.C3856G      | p.Q1286E     | 8,8/29,29   | 21.62 | 78.38 | 445.09  |
| CASE 110-MPNST | chr5:56176912   | T>C                     | exonic   | MAP3K1         | NM_005921 : c.T2182C      | p.S728P      | 17,16/24,18 | 44    | 56    | 682.1   |
| CASE 110-MPNST | chr6:106553314  | G>A                     | exonic   | PRDM1          | NM_001198 : c.G1279A      | p.A427T      | 29,26/50,51 | 35.26 | 64.74 | 1750.92 |
| CASE 110-MPNST | chr6:51771137   | C>G                     | exonic   | PKHD1          | NM_138694.3 : c.G6684C    | p.E2228D     | 12,14/14,12 | 50    | 50    | 271.32  |
| CASE 110-MPNST | chr7:80299305   | AGGTATTGCAGTCTTTTCTCT>A | exonic   | CD36           | NM_000072 : c.787_808del  | p.V263Ifs*16 | 9,10/26,32  | 24.68 | 75.32 | 712.74  |
| CASE 110-MPNST | chr8:113657421  | C>T                     | exonic   | CSMD3          | NM_198123 : c.3227G>A     | p.G1076E     | 14,22/16,29 | 44.44 | 55.56 | 426.28  |
| CASE 110-MPNST | chr8:30916743   | C>A                     | exonic   | WRN            | NM_000553 : c.C171A       | p.Y57X       | 13,17/21,23 | 40.54 | 59.46 | 909.72  |
| CASE 110-MPNST | chr9:21971208   | C>G                     | splicing | CDKN2A         | NM_000077 : c.151-1G>C    |              | 9,11/14,27  | 32.79 | 67.21 | 424.69  |
| CASE 110-MPNST | chrX:76939216   | TC>T                    | exonic   | ATRX           | NM_000489 : c.1531delG    | p.E511Kfs*3  | 8,8/22,19   | 28.07 | 71.93 | 750.5   |

| ID              | Chr:Pos        | Base Change | Region | Gene  | CDS                              | AA_change          | Alt+,Alt-<br>/Ref+,Ref- | % VAF | % RAF | Avg<br>Cov |
|-----------------|----------------|-------------|--------|-------|----------------------------------|--------------------|-------------------------|-------|-------|------------|
| Case 130-GLIOMA | chr2:100210342 | CCTCAGCC>GC | exonic | AFF3  | NM_1025108 : c.1856_1863delinsGC | p.T619_A621delinsS | 6,6/41,33               | 14    | 86    | 514.98     |
| Case 130-GLIOMA | chr19:6586291  | T>C         | exonic | CD70  | NM_001252 : c.A322G              | p.I108V            | 22,38/67,56             | 32.79 | 67.21 | 287.15     |
| Case 130-GLIOMA | chr16:68842734 | C>T         | exonic | CDH1  | NM_004360 : c.C670T              | p.R224C            | 53,57/21,29             | 68.75 | 31.25 | 516.11     |
| Case 130-GLIOMA | chr7:142562051 | CCCT>C      | exonic | EPHB6 | NM_004445 : c.497_499delCCCT     | p.S177del          | 28,28/78,76             | 26.67 | 73.33 | 542.61     |
| Case 130-GLIOMA | chrX:48652297  | G>A         | exonic | GATA1 | NM_002049 : c.G968A              | p.G323D            | 8,6/73,79               | 8.43  | 91.57 | 253.77     |

|                 |                |      |        |         |                             |            |               |       |       |        |
|-----------------|----------------|------|--------|---------|-----------------------------|------------|---------------|-------|-------|--------|
| Case 130-GLIOMA | chr12:49423224 | C>A  | exonic | KMT2D   | NM_003482 : c.G14035T       | p.A4679S   | 42,67/43,63   | 50.7  | 49.3  | 326.47 |
| Case 130-GLIOMA | chr17:36881009 | C>T  | exonic | MLLT6   | NM_005937 : c.C3020T        | p.A1007V   | 25,51/8,24    | 70.37 | 29.63 | 182.95 |
| Case 130-GLIOMA | chr20:46265162 | T>G  | exonic | NCOA3   | NM_181659 : c.T2032G        | p.L678V    | 52,46/103,96  | 33    | 67    | 946.39 |
| Case 130-GLIOMA | chr17:29677208 | T>TA | exonic | NF1     | NM_000267 : c.7266_7267insA | p.T2423Nfs | 88,77/145,125 | 37.93 | 62.07 | 789.67 |
| Case 130-GLIOMA | chr15:88472622 | G>A  | exonic | NTRK3   | NM_001012338 : c.C1933T     | p.R645C    | 37,82/56,89   | 45.08 | 54.92 | 642.77 |
| Case 130-GLIOMA | chr15:88476307 | C>T  | exonic | NTRK3   | NM_001012338 : c.G1825A     | p.D609N    | 91,72/87,90   | 47.94 | 52.06 | 621.8  |
| Case 130-GLIOMA | chr1:144881463 | C>T  | exonic | PDE4DIP | NM_001198834 : c.G3733A     | p.A1245T   | 48,16/234,144 | 14.48 | 85.52 | 784.55 |
| Case 130-GLIOMA | chr5:149516594 | G>A  | exonic | PDGFRB  | NM_002609 : c.C17T          | p.A6V      | 30,26/33,39   | 43.75 | 56.25 | 138.31 |
| Case 130-GLIOMA | chr12:7067226  | G>A  | exonic | PTPN6   | NM_080548 : c.G1357A        | p.V453M    | 45,84/38,62   | 56.33 | 43.67 | 305.78 |
| Case 130-GLIOMA | chr8:145737579 | G>A  | exonic | RECQL4  | NM_004260 : c.C3184T        | p.R1062W   | 48,39/47,35   | 51.48 | 48.52 | 246.5  |
| Case 130-GLIOMA | chr3:128369613 | G>C  | exonic | RPN1    | NM_002950 : c.C31G          | p.L11V     | 26,40/14,28   | 61.11 | 38.89 | 174.54 |
| Case 130-GLIOMA | chr17:78765287 | G>A  | exonic | RPTOR   | NM_020761 : c.G868A         | p.V290I    | 106,120/44,37 | 73.62 | 26.38 | 628.62 |
| Case 130-GLIOMA | chr16:2138543  | C>T  | exonic | TSC2    | NM_000548 : c.C5356T        | p.P1786S   | 20,19/42,51   | 29.55 | 70.45 | 198.42 |

| ID              | Chr:Pos         | Base Change  | Region | Gene    | CDS                               | AA_change    | Alt <sup>+</sup> -Alt-<br>/Ref <sup>+</sup> ,Ref- | %VAF  | %RAF  | Avg<br>Cov |
|-----------------|-----------------|--------------|--------|---------|-----------------------------------|--------------|---------------------------------------------------|-------|-------|------------|
| CASE 132-GLIOMA | chr22:23654020  | G>A          | exonic | BCR     | NM_004327 : c.G3319A              | p.V1107I     | 26,71/160,249                                     | 19.17 | 80.83 | 674.58     |
| CASE 132-GLIOMA | chr17:33281597  | C>T          | exonic | CCT6B   | NM_006584 : c.G358A               | p.A120T      | 85,217/37,81                                      | 71.9  | 28.1  | 686.68     |
| CASE 132-GLIOMA | chr7:100421430  | C>T          | exonic | EPHB4   | NM_004444 : c.G247A               | p.A83T       | 56,69/60,68                                       | 49.41 | 50.59 | 263.24     |
| CASE 132-GLIOMA | chr6:108984811  | A>T          | exonic | FOXO3   | NM_001455 : c.A775T               | p.K259X      | 42,46/234,265                                     | 14.99 | 85.01 | 1021       |
| CASE 132-GLIOMA | chr5:35867528   | G>C          | exonic | IL7R    | NM_002185 : c.G342C               | p.K114N      | 154,114/204,123                                   | 45.04 | 54.96 | 673.08     |
| CASE 132-GLIOMA | chr16:85945187  | G>A          | exonic | IRF8    | NM_002163 : c.G370A               | p.V124M      | 119,63/130,78                                     | 46.67 | 53.33 | 422.77     |
| CASE 132-GLIOMA | chr8:41794939   | G>A          | exonic | KAT6A   | NM_006766 : c.C3187T              | p.P1063S     | 110,173/156,192                                   | 44.85 | 55.15 | 776.09     |
| CASE 132-GLIOMA | chr10:129904142 | G>C          | exonic | MKI67   | NM_002417 : c.C5962G              | p.P1988A     | 141,163/387,458                                   | 26.46 | 73.54 | 1939.67    |
| CASE 132-GLIOMA | chr5:79950727   | GCAGCGCCCC>G | exonic | MSH3    | NM_002439 : c.182_190delCAGCGCCCC | p.P67_P69del | 4,76/48,160                                       | 27.78 | 72.22 | 358.86     |
| CASE 132-GLIOMA | chr17:29560088  | CA>C         | exonic | NF1     | NM_000267 : c.3566delA            | p.G1190Afs   | 266,198/130,114                                   | 65.54 | 34.46 | 937.71     |
| CASE 132-GLIOMA | chr5:176638736  | C>G          | exonic | NSD1    | NM_172349 : c.C2529G              | p.S843R      | 213,240/227,244                                   | 49.03 | 50.97 | 1147.75    |
| CASE 132-GLIOMA | chr2:242045997  | C>T          | exonic | PASK    | NM_015148 : c.G3956A              | p.R1319H     | 59,25/158,86                                      | 25.61 | 74.39 | 387.46     |
| CASE 132-GLIOMA | chr2:242065799  | G>T          | exonic | PASK    | NM_015148 : c.C2531A              | p.P844Q      | 113,97/51,44                                      | 68.85 | 31.15 | 353.56     |
| CASE 132-GLIOMA | chr2:242065986  | C>G          | exonic | PASK    | NM_015148 : c.G2344C              | p.G782R      | 49,39/147,132                                     | 23.98 | 76.02 | 353.56     |
| CASE 132-GLIOMA | chr13:49030416  | C>A          | exonic | RB1     | NM_000321 : c.C1891A              | p.Q631K      | 147,94/338,323                                    | 26.72 | 73.28 | 1069.43    |
| CASE 132-GLIOMA | chrX:128605236  | C>G          | exonic | SMARCA1 | NM_003069 : c.G2510C              | p.G837A      | 210,167/237,223                                   | 45.04 | 54.96 | 949.4      |
| CASE 132-GLIOMA | chr22:38374092  | A>T          | exonic | SOX10   | NM_006941 : c.T479A               | p.L160H      | 5,8/41,96                                         | 8.67  | 91.33 | 179.27     |

| ID             | Chr:Pos      | Base Change | Region | Gene  | CDS                    | AA_change | Alt <sup>+</sup> -Alt-<br>/Ref <sup>+</sup> ,Ref- | %VAF  | %RAF | Avg<br>Cov |
|----------------|--------------|-------------|--------|-------|------------------------|-----------|---------------------------------------------------|-------|------|------------|
| CASE 60-GLIOMA | chrX:1522163 | CA>C        | exonic | ASMTL | NM_004192 : c.1864delT | p.X622Efs | 208,76/14,1                                       | 94.98 | 5.02 | 787.06     |

|                |                 |                              |          |             |                                                     |                |                 |       |       |         |
|----------------|-----------------|------------------------------|----------|-------------|-----------------------------------------------------|----------------|-----------------|-------|-------|---------|
| CASE 60-GLIOMA | chrX:1531700    | A>T                          | exonic   | ASMTL       | NM_004192 : c.T1570A                                | p.C524S        | 104,123/136,165 | 42.99 | 57.01 | 916.44  |
| CASE 60-GLIOMA | chr12:113531455 | C>T                          | exonic   | DTX1        | NM_004416 : c.C1115T                                | p.P372L        | 52,37/60,51     | 44.5  | 55.5  | 194     |
| CASE 60-GLIOMA | chr3:10089607   | A>G                          | exonic   | FANCD2      | NM_001018115 : c.A1285G                             | p.K429E        | 60,36/371,211   | 14.16 | 85.84 | 1297.93 |
| CASE 60-GLIOMA | chr11:22646561  | G>A                          | exonic   | FANCF       | NM_022725 : c.C796T                                 | p.R266C        | 144,158/192,169 | 45.55 | 54.45 | 1005.19 |
| CASE 60-GLIOMA | chr9:35076975   | C>T                          | exonic   | FANCG       | NM_004629 : c.G770A                                 | p.R257H        | 115,99/129,104  | 47.87 | 52.13 | 612.39  |
| CASE 60-GLIOMA | chr2:216235046  | C>T                          | exonic   | FN1         | NM_212482 : c.G6824A                                | p.R2275Q       | 126,110/56,37   | 71.73 | 28.27 | 479.43  |
| CASE 60-GLIOMA | chr6:108882647  | TCGGCGG>T                    | exonic   | FOXO3       | NM_001455 : c.237_242delCGGCGG                      | p.G83_G84del   | 39,35/73,89     | 31.36 | 68.64 | 221.03  |
| CASE 60-GLIOMA | chr6:108882706  | C>T                          | exonic   | FOXO3       | NM_001455 : c.C295T                                 | p.R99W         | 16,56/32,83     | 38.5  | 61.5  | 221.03  |
| CASE 60-GLIOMA | chr20:57429696  | C>G                          | exonic   | GNAS        | NM_080425 : c.C1376G                                | p.P459R        | 21,36/9,31      | 58.76 | 41.24 | 233.58  |
| CASE 60-GLIOMA | chr12:49445189  | TGGCTCCTCAGCCGGGGGACAGGTGC>T | exonic   | KMT2D       | NM_003482 : c.2250_2276delGCACCTGTCCCCCGGCTGAGGAGCC | p.R755_P763del | 50,64/176,220   | 30.32 | 69.68 | 912.65  |
| CASE 60-GLIOMA | chr3:65415516   | C>T                          | exonic   | MAG1 (BAP1) | NM_001033057 : c.G1846A                             | p.V616M        | 49,50/170,194   | 21.38 | 78.62 | 891.56  |
| CASE 60-GLIOMA | chr3:38181894   | G>A                          | exonic   | MYD88       | NM_001172567 : c.G518A                              | p.R173H        | 126,66/64,38    | 65.31 | 34.69 | 603.23  |
| CASE 60-GLIOMA | chr17:29559089  | A>G                          | splicing | NF1         | NM_000267 : c.3198-2A>G                             | p.?            | 86,27/35,15     | 69.33 | 30.67 | 465.85  |
| CASE 60-GLIOMA | chr9:139417431  | C>G                          | exonic   | NOTCH1      | NM_017617 : c.G613C                                 | p.V205L        | 45,33/46,27     | 51.66 | 48.34 | 187.06  |
| CASE 60-GLIOMA | chr2:242065799  | G>T                          | exonic   | PASK        | NM_015148 : c.C2531A                                | p.P844Q        | 84,64/38,26     | 69.81 | 30.19 | 310.12  |
| CASE 60-GLIOMA | chr2:242046785  | A>C                          | exonic   | PASK        | NM_015148 : c.T3797G                                | p.F1266C       | 158,89/1,1      | 100   | 0     | 348.68  |
| CASE 60-GLIOMA | chr1:144854574  | T>C                          | exonic   | PDE4DIP     | NM_001198834 : c.A6896G                             | p.H2299R       | 65,95/463,491   | 14.36 | 85.64 | 1439.05 |
| CASE 60-GLIOMA | chr8:145736909  | C>A                          | exonic   | RECQL4      | NM_004260 : c.G3532T                                | p.G1178W       | 59,73/16,27     | 75.43 | 24.57 | 205.73  |
| CASE 60-GLIOMA | chr7:92733601   | G>A                          | exonic   | SAMD9       | NM_001193307 : c.C1810T                             | p.Q604X        | 196,196/186,180 | 51.72 | 48.28 | 1811.59 |
| CASE 60-GLIOMA | chr12:54577514  | G>C                          | exonic   | SMUG1       | NM_001243788 : c.C211G                              | p.R71G         | 109,129/113,154 | 47.13 | 52.87 | 576.61  |
| CASE 60-GLIOMA | chr1:16260917   | G>A                          | exonic   | SPEN        | NM_015001 : c.G8182A                                | p.A2728T       | 103,101/31,35   | 75.56 | 24.44 | 811.5   |
| CASE 60-GLIOMA | chrX:48887947   | C>T                          | exonic   | TFE3        | NM_006521 : c.G1450A                                | p.A484T        | 78,57/57,76     | 50.37 | 49.63 | 290.26  |

| ID              | Chr:Pos         | Base Change | Region | Gene    | CDS                     | AA_change | Alt+,Alt-/Ref+,Ref- | %VAF  | %RAF  | Avg Cov |
|-----------------|-----------------|-------------|--------|---------|-------------------------|-----------|---------------------|-------|-------|---------|
| CASE 134-GLIOMA | chr6:157099260  | A>G         | exonic | ARID1B  | NM_020732 : c.A197G     | p.N66S    | 9,24/15,22          | 47.14 | 52.86 | 92.12   |
| CASE 134-GLIOMA | chrX:76856021   | T>C         | exonic | ATRX    | NM_000489 : c.A5579G    | p.N1860S  | 176,240/1,1         | 100   | 0     | 494.65  |
| CASE 134-GLIOMA | chrX:129147373  | G>A         | exonic | BCORL1  | NM_021946 : c.G625A     | p.G209S   | 151,137/2,1         | 99.31 | 0.69  | 355.95  |
| CASE 134-GLIOMA | chr9:136913474  | C>T         | exonic | BRD3    | NM_007371 : c.G817A     | p.A273T   | 138,137/65,63       | 68.24 | 31.76 | 417.76  |
| CASE 134-GLIOMA | chr12:113515442 | A>T         | exonic | DTX1    | NM_004416 : c.A473T     | p.Q158L   | 59,116/93,147       | 42.17 | 57.83 | 655.05  |
| CASE 134-GLIOMA | chr7:151874751  | C>T         | exonic | KMT2C   | NM_170606 : c.G7787A    | p.R2596Q  | 326,344/364,345     | 48.59 | 51.41 | 1876.38 |
| CASE 134-GLIOMA | chr7:151882672  | C>A         | exonic | KMT2C   | NM_170606 : c.G5053T    | p.A1685S  | 87,63/367,305       | 18.25 | 81.75 | 779.12  |
| CASE 134-GLIOMA | chr12:49445392  | G>T         | exonic | KMT2D   | NM_003482 : c.C2074A    | p.P692T   | 387,290/322,292     | 52.44 | 47.56 | 1444.84 |
| CASE 134-GLIOMA | chr17:29667632  | CT>C        | exonic | NF1     | NM_000267 : c.6969delT  | p.L2323X  | 111,186/61,104      | 64.29 | 35.71 | 576.6   |
| CASE 134-GLIOMA | chr6:32166766   | G>A         | exonic | NOTCH4  | NM_004557 : c.C4472T    | p.P1491L  | 60,49/151,144       | 26.98 | 73.02 | 357.22  |
| CASE 134-GLIOMA | chr1:144855783  | G>A         | exonic | PDE4DIP | NM_001198834 : c.C6770T | p.A2257V  | 51,82/215,250       | 22.24 | 77.76 | 659.95  |

|                 |                |     |        |       |                      |          |                 |       |       |         |
|-----------------|----------------|-----|--------|-------|----------------------|----------|-----------------|-------|-------|---------|
| CASE 134-GLIOMA | chr7:128851596 | C>G | exonic | SMO   | NM_005631 : c.C1921G | p.P641A  | 24,55/20,69     | 47.02 | 52.98 | 271     |
| CASE 134-GLIOMA | chr10:70332891 | C>G | exonic | TET1  | NM_030625 : c.C796G  | p.P266A  | 291,248/140,114 | 67.97 | 32.03 | 806.14  |
| CASE 134-GLIOMA | chr10:70406189 | G>C | exonic | TET1  | NM_030625 : c.G3703C | p.V1235L | 294,287/110,101 | 73.36 | 26.64 | 1105.02 |
| CASE 134-GLIOMA | chr8:15605938  | C>A | exonic | TUSC3 | NM_006765 : c.C992A  | p.S331X  | 49,65/151,173   | 26.03 | 73.97 | 463.88  |

| ID              | Chr:Pos         | Base Change              | Region | Gene     | CDS                          | AA_change       | Alt+,Alt-<br>/Ref+,Ref- | %VAF  | %RAF  | Avg<br>Cov |
|-----------------|-----------------|--------------------------|--------|----------|------------------------------|-----------------|-------------------------|-------|-------|------------|
| CASE 194-GLIOMA | chrX:76872079   | ACCTGTAAAGTGATCTAAGTAG>A | exonic | ATRX     | NM_000489 : c.5547_5566+1del | p.Y1849*        | 69,46/320,276           | 16.17 | 83.83 | 649.07     |
| CASE 194-GLIOMA | chr7:101713691  | G>A                      | exonic | CUX1     | NM_001913 : c.G295A          | p.V99I          | 166,171/163,175         | 49.93 | 50.07 | 655.16     |
| CASE 194-GLIOMA | chr3:10105516   | A>C                      | exonic | FANCD2   | NM_001018115 : c.A1868C      | p.Q623P         | 170,197/450,288         | 33.21 | 66.79 | 1249.54    |
| CASE 194-GLIOMA | chr11:118344240 | C>T                      | exonic | KMT2A    | NM_001197104 : c.C2366T      | p.T789I         | 247,287/264,302         | 48.55 | 51.45 | 1452.62    |
| CASE 194-GLIOMA | chr5:79974821   | C>T                      | exonic | MSH3     | NM_002439 : c.C1249T         | p.R417W         | 139,192/235,273         | 39.45 | 60.55 | 823.9      |
| CASE 194-GLIOMA | chr17:29588781  | GC>G                     | exonic | NF1      | NM_000267 : c.4568delC       | p.A1523Dfs*30   | 272,215/427,408         | 36.84 | 63.16 | 1331.74    |
| CASE 194-GLIOMA | chr17:29664505  | CG>C                     | exonic | NF1      | NM_000267 : c.6485delG       | p.D2163Tfs*16   | 175,226/275,301         | 41.04 | 58.96 | 1087.43    |
| CASE 194-GLIOMA | chr9:139411768  | C>T                      | exonic | NOTCH1   | NM_017617 : c.G1511A         | p.R504H         | 117,96/121,120          | 46.92 | 53.08 | 387.93     |
| CASE 194-GLIOMA | chr5:131951706  | G>T                      | exonic | RAD50    | NM_005732 : c.G3048T         | p.R1016S        | 137,29/123,40           | 50.46 | 49.54 | 482.37     |
| CASE 194-GLIOMA | chr16:2121617   | T>C                      | exonic | TSC2     | NM_000548 : c.T1946C         | p.M649T         | 112,181/119,222         | 46.21 | 53.79 | 806.44     |
| CASE 194-GLIOMA | chr9            |                          |        | CDKN2A/B |                              | Homozygous loss |                         |       |       |            |

| ID              | Chr:Pos        | Base Change   | Region   | Gene     | CDS                                 | AA_change       | Alt+,Alt-<br>/Ref+,Ref- | %VAF  | %RAF  | Avg<br>Cov |
|-----------------|----------------|---------------|----------|----------|-------------------------------------|-----------------|-------------------------|-------|-------|------------|
| CASE 351-GLIOMA | chr12:52385751 | A>G           | exonic   | ACVR1B   | NM_020328.3 : c.A1489G              | p.I497V         | 350,355/602,699         | 35.14 | 64.86 | 2717.92    |
| CASE 351-GLIOMA | chr20:31024254 | C>T           | exonic   | ASXL1    | NM_015338.5 : c.C3739T              | p.R1247C        | 254,298/255,310         | 49.42 | 50.58 | 1984.45    |
| CASE 351-GLIOMA | chrX:76875920  | G>A           | exonic   | ATRX     | NM_000489.4 : c.C5215T              | p.R1739*        | 109,170/61,72           | 67.72 | 32.28 | 417.67     |
| CASE 351-GLIOMA | chr6:18249892  | C>T           | exonic   | DEK      | NM_003472.3 : c.G752A               | p.S251N         | 167,10/339,38           | 31.95 | 68.05 | 1362.75    |
| CASE 351-GLIOMA | chr6:15496952  | C>T           | exonic   | JARID2   | NM_004973.3 : c.C1496T              | p.P499L         | 295,250/288,245         | 50.56 | 49.44 | 1358.12    |
| CASE 351-GLIOMA | chr17:29541603 | TGTAA>T       | splicing | NF1      | NM_000267 : c.1527+1_1527+4delGTAA  | p.?             | 112,227/59,75           | 71.67 | 28.33 | 551.35     |
| CASE 351-GLIOMA | chr17:5462523  | C>T           | exonic   | NLRP1    | NM_033004.3 : c.G1493A              | p.R498K         | 213,231/363,386         | 37.22 | 62.78 | 1799.03    |
| CASE 351-GLIOMA | chr7:6018314   | TGAGAGT>TGAGC | exonic   | PMS2     | NM_000535.6 : c.2182_2187delinsGCTC | p.L728Afs*6     | 42,110/512,474          | 13.36 | 86.64 | 1034.43    |
| CASE 351-GLIOMA | chr7:6035200   | A>C           | exonic   | PMS2     | NM_000535.6 : c.T868G               | p.F290V         | 541,308/355,184         | 61.17 | 38.83 | 1723.8     |
| CASE 351-GLIOMA | chr7:103216152 | G>C           | exonic   | RELN     | NM_005045.3 : c.C4146G              | p.S1382R        | 153,310/194,326         | 47.1  | 52.9  | 1561.11    |
| CASE 351-GLIOMA | chr7:103275891 | G>A           | exonic   | RELN     | NM_005045.3 : c.C2446T              | p.L816F         | 283,107/310,148         | 45.99 | 54.01 | 1328.6     |
| CASE 351-GLIOMA | chrX:70601712  | C>T           | exonic   | TAF1     | NM_004606.4 : c.C1540T              | p.R514W         | 281,472/1,1             | 99.74 | 0.26  | 1270.94    |
| CASE 351-GLIOMA | chr10:98133376 | C>T           | exonic   | TLL2     | NM_012465.3 : c.G2639A              | p.G880D         | 174,57/236,95           | 41.1  | 58.9  | 838.43     |
| CASE 351-GLIOMA | chr16:2138570  | C>T           | exonic   | TSC2     | NM_000548.4 : c.C5383T              | p.R1795C        | 114,185/121,200         | 48.23 | 51.77 | 756.3      |
| CASE 351-GLIOMA | chr9           |               |          | CDKN2A/B |                                     | Homozygous loss |                         |       |       |            |

**Table S3. Telomere alterations in rare NF1-associated tumors (n=46).**

| Tumor Type                      | N  | Telomere Abnormalities (%) |          |      |          | ATRX alterations                            |
|---------------------------------|----|----------------------------|----------|------|----------|---------------------------------------------|
|                                 |    | ALT                        | Short    | Long | Normal   | Loss by IHC                                 |
| GIST                            | 12 | 0                          | 5 (42%)  | 0    | 7 (58%)  | 0 (of 6)                                    |
| Pheochromocytoma                | 7  | 0                          | 1 (100%) | 0    | 0        | 1 (of 4)                                    |
| Glomus tumor                    | 5  | 0                          | 0        | 0    | 4 (100%) | 0 (of 4)                                    |
| Neuroendocrine tumors           | 6  | 0                          | 4 (66%)  | 0    | 2 (33%)  | No <i>ATRX/DAXX</i> mutations <sup>28</sup> |
| Lipoma                          | 5  | 0                          | 0        | 0    | 4 (100%) | -                                           |
| Schwannoma                      | 2  | 0                          | 0        | 0    | 2 (100%) | 0 (of 2)                                    |
| Juvenile xanthogranuloma        | 3  | 0                          | 1 (33%)  | 0    | 2 (66%)  | 0 (of 3)                                    |
| Gangliocytic paraganglioma      | 2  | 0                          | 0        | 0    | 1 (100%) | -                                           |
| Dermatofibroma                  | 1  | 0                          | 0        | 0    | 1 (100%) | -                                           |
| Ovarian serous carcinoma        | 1  | 0                          |          |      |          | 0 (of 1)                                    |
| Syringocystadenoma papilliferum | 1  | 0                          | 0        | 0    | 1 (100%) | 0 (of 1)                                    |
| Malignant phyllodes tumor       | 1  | 1                          | 0        | 0    | 0        | 0 (of 1)                                    |

<sup>28</sup>Noë et al, Modern Pathology, 2018.



**Table S4. Association of telomere length with overall survival in patients with glioma.**

|                        | Death/Censor | Person-time<br>(months) | Univariate* |              |         | Multivariate |              |         |
|------------------------|--------------|-------------------------|-------------|--------------|---------|--------------|--------------|---------|
|                        |              |                         | HR          | (95% CI)     | P-value | HR           | (95% CI)     | P-value |
| <b>Age</b>             | 15/17        | 2068                    | 1.05        | (1.01-1.09)  | 0.03    | 1.02         | (0.95-1.08)  | 0.6     |
| <b>Grade</b>           |              |                         |             |              |         |              |              |         |
| Low                    | 3/12         | 1813                    | 1           | (Ref)        | -       | 1            | (Ref)        | -       |
| High                   | 12/15        | 255                     | 7.36        | (2.18-24.77) | 0.001   | 3.09         | (0.70-13.60) | 0.1     |
| <b>Telomere Length</b> |              |                         |             |              |         |              |              |         |
| Normal                 | 3/10         | 1392                    | 1           | (Ref)        | -       | 1            | (Ref)        | -       |
| Long                   | 4/3          | 428                     | 3.99        | (0.70-22.77) | 0.1     | 3.2          | (0.47-21.92) | 0.2     |
| ALT                    | 8/4          | 248                     | 13.05       | (2.35-72.43) | 0.003   | 4.16         | (0.40-42.88) | 0.2     |

\*Cases without telomere length are not included.

**Table S5. Association of telomere lengths with overall survival in all patients with MPNST**

|                         | Death/Censor | Person-time<br>(months) | Univariate |              |         | Multivariate |              |         |
|-------------------------|--------------|-------------------------|------------|--------------|---------|--------------|--------------|---------|
|                         |              |                         | HR         | (95% CI)     | P-value | HR           | (95% CI)     | P-value |
| <b>Age</b>              | 24/25        | 1779                    | 1.01       | (0.99-1.03)  | 0.4     | 1.01         | (0.99-1.03)  | 0.4     |
| <b>Grade</b>            |              |                         |            |              |         |              |              |         |
| Low                     | 1/3          | 168                     | 1.00       | (Ref)        | -       | 1.00         | (Ref)        | -       |
| High                    | 23/22        | 1612                    | 2.86       | (0.38-21.40) | 0.3     | 3.48         | (0.42-28.97) | 0.2     |
| <b>Telomere lengths</b> |              |                         |            |              |         |              |              |         |
| Normal                  | 6/10         | 417                     | 1.00       | (Ref)        | -       | 1.00         | (Ref)        | -       |
| Short                   | 1/13         | 801                     | 0.13       | (0.02-1.07)  | 0.06    | 0.09         | (0.01-0.79)  | 0.03    |
| ALT                     | 17/2         | 561                     | 1.95       | (0.76-5.00)  | 0.2     | 1.30         | (0.43-3.91)  | 0.6     |

**Table S6. Association of ALT with overall survival in all patients with MPNST.**

|                   | Death/Censor | Person-time (months) | Univariate* |              |         | Multivariate |              |         |
|-------------------|--------------|----------------------|-------------|--------------|---------|--------------|--------------|---------|
|                   |              |                      | HR          | (95% CI)     | P-value | HR           | (95% CI)     | P-value |
| <b>Age</b>        | 76/51        | 3818                 | 1.01        | (0.99-1.02)  | 0.3     | 1.01         | (0.99-1.02)  | 0.3     |
| <b>Grade</b>      |              |                      |             |              |         |              |              |         |
| Low               | 3/10         | 688                  | 1.00        | (Ref)        | -       | 1.00         | (Ref)        | -       |
| High              | 73/41        | 3130                 | 5.47        | (1.71-17.46) | 0.004   | 5.32         | (1.66-17.07) | 0.005   |
| <b>ALT status</b> |              |                      |             |              |         |              |              |         |
| Negative          | 59/49        | 3256                 | 1.00        | (Ref)        | -       | 1.00         | (Ref)        | -       |
| Positive          | 17/2         | 561                  | 1.51        | (0.87-2.60)  | 0.1     | 1.23         | (0.70-2.15)  | 0.5     |

\*Cases without ALT status are not included.
